# Supplementary material for: Mammal responses to global changes in human activity vary by trophic group and landscape
Source: PubMed Central journal article supplement (PMC11090811; doi:10.1038/s41559-024-02363-2), 2024-03-18
Supplement: 41559_2024_2363_MOESM1_ESM.pdf [file 41559_2024_2363_MOESM1_ESM.pdf]

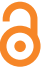

---

# Mammal responses to global changes in human activity vary by trophic group and landscape

---

In the format provided by the authors and unedited

---

## Supplementary Information: Table of contents

|                                |    |
|--------------------------------|----|
| Extended Results.....          | 2  |
| Amount of animal activity..... | 2  |
| Timing of animal activity..... | 3  |
| Supplementary Fig. 1.....      | 4  |
| Supplementary Fig. 2.....      | 5  |
| Supplementary Fig. 3.....      | 6  |
| Supplementary Fig. 4.....      | 7  |
| Supplementary Table 1.....     | 8  |
| Supplementary Table 2.....     | 15 |
| Supplementary Table 3.....     | 16 |
| Supplementary Table 4.....     | 17 |
| Supplementary Table 5.....     | 18 |
| Supplementary Table 6.....     | 19 |
| Supplementary Table 7.....     | 20 |
| Supplementary Table 8.....     | 21 |
| Supplementary Table 9.....     | 22 |
| Supplementary Table 10.....    | 23 |
| Full Acknowledgements.....     | 33 |

## Extended Results

### *Amount of animal activity*

#### *Global model*

The global model to explain variation in changes in the amount of animal activity contained 1065 population responses representing 102 unique projects and 163 species. The global model fixed effects accounted for 25.4% of the variance explained (pseudo- $R^2$ ). Trophic group was the strongest predictor of responses to higher human activity, with large herbivores showing the strongest increases in activity (+23%), and carnivores showing the strongest decreases (-10%; Fig. 2C; Supplementary Table 2; Supplementary Fig. 3). Animals in open habitats had reduced activity relative to animals in closed habitats (-15.8%, coefficient = -0.172; 95% CI = -0.3428 to -0.0018), and animal activity in developed areas (i.e., higher HMI; Table 1) generally increased with higher levels of human activity (+25%), while animals in less developed areas (lower HMI) decreased their activity (-6%, coefficient = 0.077; 95% CI = -0.001 to 0.156). We found no significant effects of diel activity, habitat breadth, diet breadth, lockdown stringency, or comparison type (year versus season) (Fig. 2C; Supplementary Fig. 3; Supplementary Table 2). The  $I^2$  of the null model (a model without fixed effects) was 16.8%, highlighting that the random intercepts account for some heterogeneity in species responses to change in human activity. Of the random effects, ‘project’ accounted for 14.8%, suggesting that environmental context explains some of the variation in responses. ‘family’ only accounted for 2%, and ‘species’ 0%, of the variation, indicating that responses were highly heterogeneous within both families and species. We acknowledge that sample sizes were uneven across species and families (Supplementary Table 1), and that bias in estimates of these random effects is likely to be higher for species (and families) with fewer populations included in our sample.

#### *Model selection of plausible interactions and non-linear terms*

Of all of the plausible interactions and non-linear terms, an interaction between HMI and trophic group was the best supported ( $\Delta AICc = -4.74$  from the global model; Supplementary Table 3). The interaction was driven by the large omnivore trophic group having a negative relationship with HMI (Fig. 2D). Whereas large omnivore activity decreased by 50% from low to high HMI, activity of the other trophic groups increased by an average of 54% across this gradient (Fig. 2D).

#### *Model selection on subsets of data*

None of the models including hunting status improved on the global model, whether as an additive term or in plausible interactions with other effects (Supplementary Table 4). Similarly, including relative brain size or the magnitude of change in human activity (locally derived from camera trap detections) failed to improve model fit over the global model (Supplementary Table 5).

## *Timing of animal activity*

### *Global model*

The global model to explain variation in changes in the timing of animal activity contained 499 population responses representing 100 unique projects and 98 species. The global model fixed effects accounted for 30.2% of the variance explained (pseudo- $R^2$ ). The strongest predictor of changes in nocturnality was the degree of human landscape modification: as human activity increased, animals tended to become more nocturnal in more developed areas (+19.3%, Fig. 3C, D; Supplementary Fig 4; coefficient = 0.047; 95% CI = 0.026 to 0.069; Supplementary Table 6). Trophic group was also an important predictor of changes in nocturnality, with large carnivores becoming significantly more nocturnal than other groups (average +5.3% relative to other groups; Fig. 3C; Supplementary Table 6). Finally, the type of quasi-experimental comparison was an important predictor of changes in timing of animal activity, with comparisons between sampling periods in different years showing higher shifts to nocturnality relative to seasonal comparisons (+6.4%; Fig 3C; Supplementary Fig. 4; Supplementary Table 6). We found no significant effect of habitat breadth, diet breadth, diel activity, lockdown stringency or habitat openness on changes in animal nocturnality (Fig. 3C; Supplementary Fig. 4; Supplementary Table 6). The  $I^2$  of the null model (a model without fixed effects) was 89.2%, highlighting that the random intercepts accounted for considerable heterogeneity in species responses to changes in human activity. Of the random effects, ‘project’ accounted for 79.0%, ‘family’ 0.9% and ‘species’ 9.3% of the variation, suggesting that environmental context explained the majority of variation in responses, with species explaining some, and responses being highly heterogeneous within families.

### *Model selection of plausible interactions and non-linear terms*

We found strong support for an interaction between HMI and trophic group ( $\Delta AICc = -10.23$  from the global model). Most trophic groups had stronger increases in nocturnality along the disturbance gradient as human activity increased (mean +22.6%), whereas the increases in nocturnality for large carnivores did not change strongly with land-use disturbance (-4.2%, Fig. 3D; Supplementary Table 7).

### *Model selection on subsets of data*

We found strong support for an interaction between population hunting status and HMI ( $\Delta AICc = -3.83$  from the global model; Supplementary Table 8) whereby hunted species showed stronger shifts to nocturnality (+26.6%) at higher human modification than their non-hunted counterparts (+13.5%, Fig 3E). All other interactions and non-linear effects did not improve on the global model (Supplementary Table 8). Furthermore, including locally derived change in human activity or relative brain size failed to improve model fit over the global model (Supplementary Table 9).

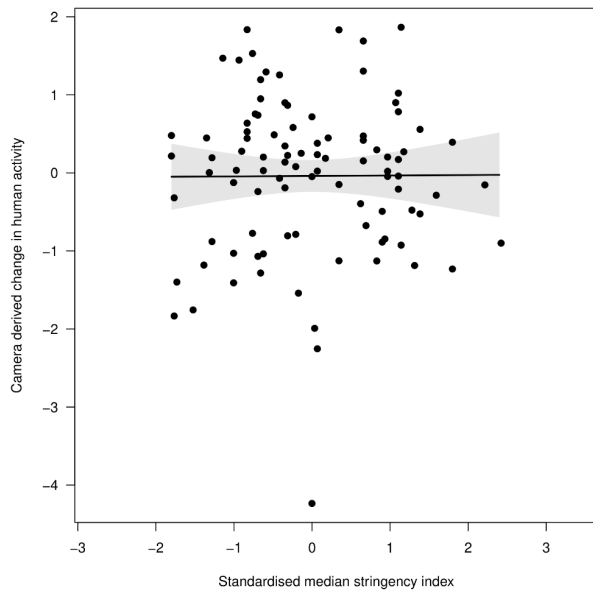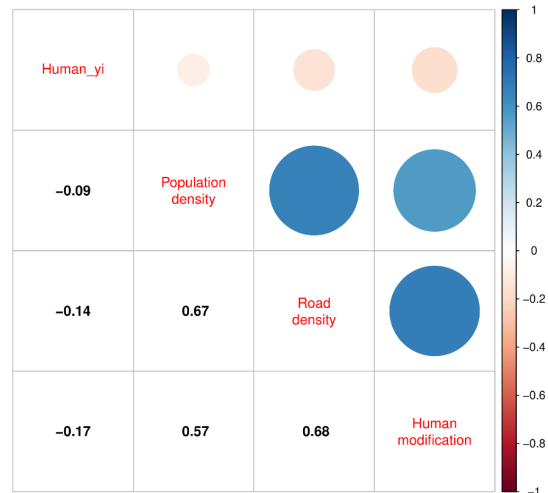

**Supplementary Figure 1.**

**No relationship between project-level camera derived magnitude of change in human activity and COVID-19 lockdown stringency (left) and other metrics of human disturbance (right) for the subset of projects with empirical estimates of human activity.** Black points = project-level mean estimates; black line = predicted relationship between stringency and local human-activity change derived from a linear model, grey polygon = 95% confidence interval of the linear model.

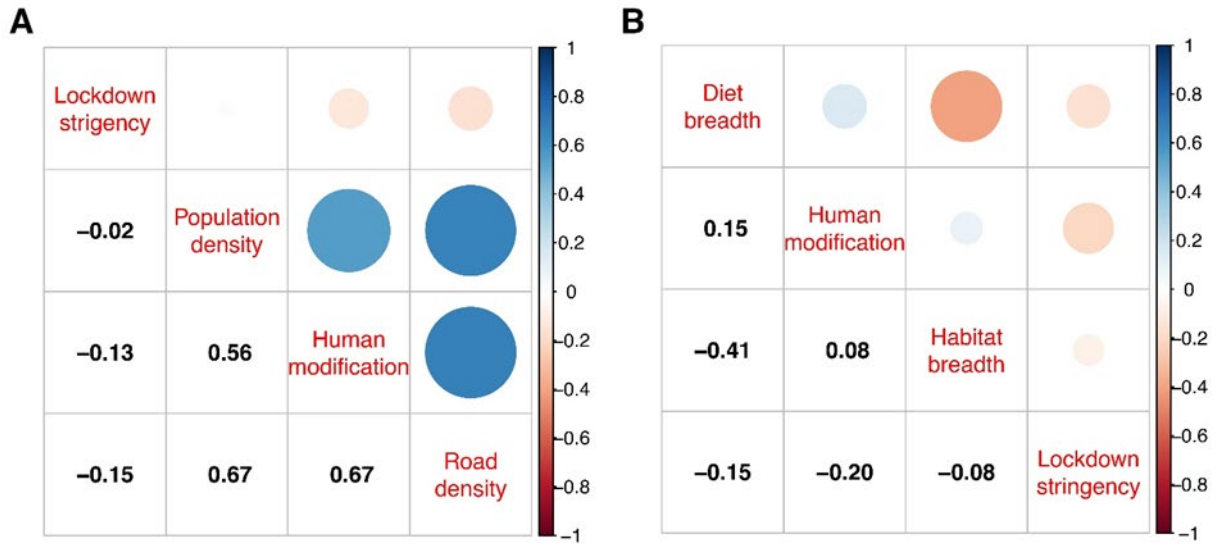

**Supplementary Figure 2.**

**Correlation coefficients between putative predictor variables for all available data.** (A) Project-level correlations between different metrics of human disturbance. (B) Population-level correlations between continuous predictors included in the meta-analysis models.

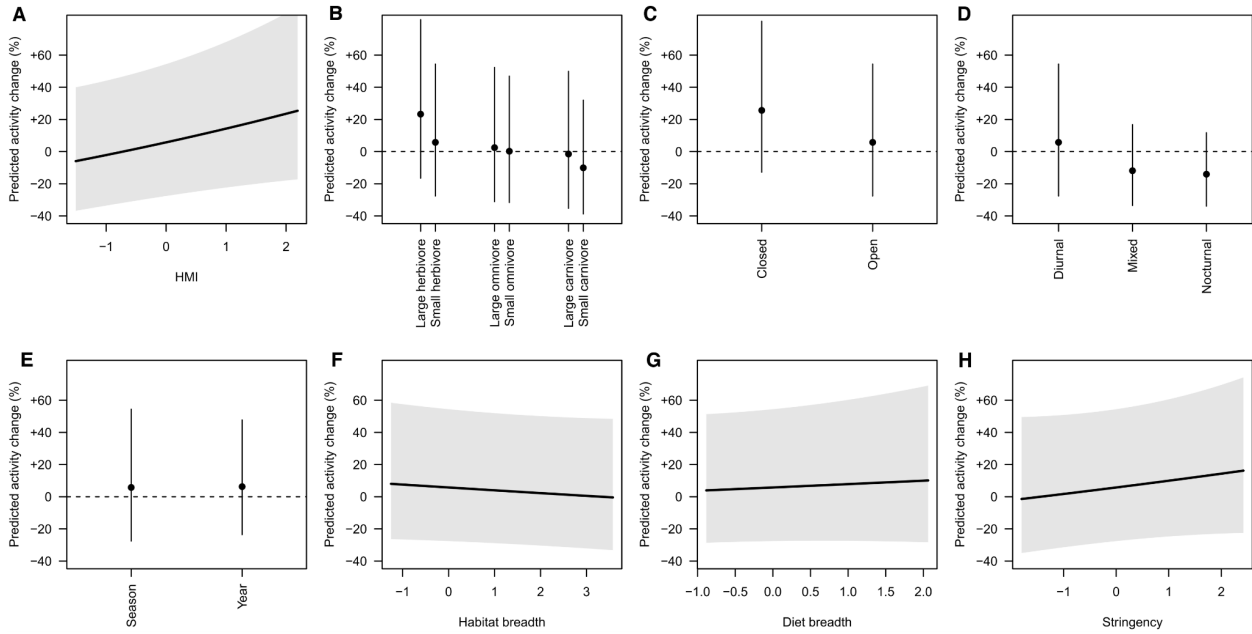

### Supplementary Figure 3.

**Model predictions for all of the variables included in the global model of changes in amount of animal activity.** Where: black lines = model predictions for continuous variables; black points = model predictions for categorical variables; grey polygon/whiskers = 95% confidence interval for the predictions (n = 1065 project-species combinations from 102 independent projects).

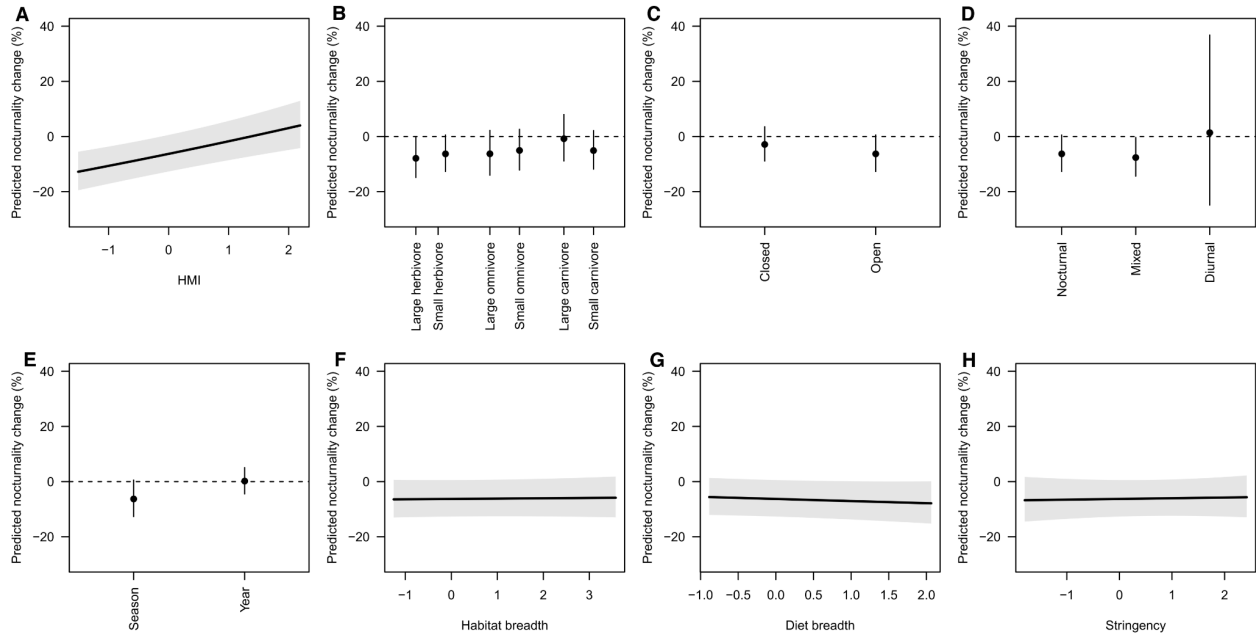

#### Supplementary Figure 4.

**Model predictions for all of the variables included in the global model of changes in timing of animal activity.** Where: black lines = model predictions for continuous variables; black points = model predictions for categorical variables; grey polygon/whiskers = 95% confidence interval for the predictions (n = 499 project-species combinations from 100 independent projects).



### Supplementary Table 1.

List of species included in the analyses of responses to changes in the amount and timing of human activity, number of projects in which they were detected, standardized values of the traits used in the meta-analysis models, and ranges for human modification index (HMI) sampled and responses observed across populations for each analysis.

| Species                      | # projects:<br>amount | # projects:<br>timing | Trophic group   | Diet breadth | Activity cycle | Habitat<br>breadth | Relative<br>brain<br>mass (g) | Human<br>modification<br>(min-max) | Amount<br>response<br>(min-max) | Timing<br>response<br>(min-max) |
|------------------------------|-----------------------|-----------------------|-----------------|--------------|----------------|--------------------|-------------------------------|------------------------------------|---------------------------------|---------------------------------|
| <i>Acinonyx jubatus</i>      | 1                     | NA                    | large_carnivore | -0.885       | diurnal_only   | 0.557              | 0.4381                        | -1.03 to -1.03                     | -0.28 to -0.28                  | NA                              |
| <i>Aepyceros melampus</i>    | 2                     | 2                     | large_herbivore | -0.885       | cathe_meral    | -0.649             | 0.4744                        | -1.16 to -1.03                     | 0.34 to 0.47                    | 0.19 to 0.23                    |
| <i>Alces alces</i>           | 11                    | 5                     | large_herbivore | -0.885       | cathe_meral    | -0.649             | 0.4731                        | -1.51 to 1.57                      | -0.93 to 0.7                    | -1.21 to 0.3                    |
| <i>Antilocapra americana</i> | 2                     | 1                     | large_herbivore | -0.885       | cathe_meral    | -0.046             | 0.4507                        | -1.3 to -1.25                      | -0.65 to 0.79                   | 0.42 to 0.42                    |
| <i>Atilax paludinosus</i>    | 1                     | NA                    | small_carnivore | 1.081        | cathe_meral    | 1.161              | 0.4178                        | -1.16 to -1.16                     | 0.68 to 0.68                    | NA                              |
| <i>Bassariscus astutus</i>   | 1                     | NA                    | small_carnivore | 0.098        | nocturnal_only | 0.557              | 0.4096                        | -0.87 to -0.87                     | -3.56 to -3.56                  | NA                              |
| <i>Bison bison</i>           | 3                     | 2                     | large_herbivore | -0.885       | cathe_meral    | 0.557              | 0.4355                        | -1.45 to -0.54                     | 0.06 to 1.1                     | -0.18 to 0.3                    |
| <i>Bos javanicus</i>         | 1                     | NA                    | large_herbivore | -0.885       | cathe_meral    | -0.649             | 0.4531                        | -0.86 to -0.86                     | -0.46 to -0.46                  | NA                              |
| <i>Canis adustus</i>         | 1                     | 1                     | small_carnivore | 2.064        | nocturnal_only | 0.557              | 0.4315                        | -1.03 to -1.03                     | -0.64 to -0.64                  | 0.05 to 0.05                    |
| <i>Canis aureus</i>          | 4                     | 2                     | small_carnivore | -0.885       | cathe_meral    | 1.161              | 0.4644                        | -0.83 to 0.16                      | -0.13 to 2.56                   | -0.96 to -0.2                   |
| <i>Canis latrans</i>         | 65                    | 39                    | small_carnivore | 0.098        | cathe_meral    | 1.161              | 0.4856                        | -1.51 to 2.19                      | -3.56 to 2.05                   | -0.61 to 0.73                   |
| <i>Canis lupus</i>           | 25                    | 8                     | large_carnivore | -0.885       | cathe_meral    | 2.367              | 0.4775                        | -1.51 to 1.24                      | -2.15 to 2.35                   | -1.6 to 0.22                    |
| <i>Canis mesomelas</i>       | 1                     | 1                     | small_carnivore | 1.081        | cathe_meral    | 2.367              | 0.4505                        | -1.03 to -1.03                     | -0.51 to -0.51                  | 0.04 to 0.04                    |
| <i>Canis rufus</i>           | 1                     | 1                     | large_carnivore | -0.885       | cathe_meral    | 0.557              | 0.4601                        | -1.45 to -1.45                     | -0.35 to -0.35                  | -0.12 to -0.12                  |
| <i>Capreolus capreolus</i>   | 22                    | 20                    | large_herbivore | -0.885       | cathe_meral    | 0.557              | 0.4547                        | -1.03 to 1.46                      | -2.08 to 1.24                   | -0.71 to 0.41                   |
| <i>Caracal caracal</i>       | 1                     | NA                    | small_carnivore | -0.885       | cathe_meral    | 1.161              | 0.4244                        | -1.03 to -1.03                     | -1.57 to -1.57                  | NA                              |
| <i>Castor canadensis</i>     | 5                     | NA                    | small_herbivore | -0.885       | cathe_meral    | -0.649             | 0.3850                        | -0.54 to 2.19                      | -0.69 to 2.04                   | NA                              |
| <i>Castor fiber</i>          | 3                     | NA                    | small_herbivore | -0.885       | cathe_meral    | -0.649             | 0.3864                        | 0.48 to 1.46                       | -2.92 to 0.92                   | NA                              |
| <i>Catopuma badia</i>        | 2                     | NA                    | small_carnivore | 0.098        | nocturnal_only | -1.253             | 0.4101                        | -0.86 to -0.85                     | -1.09 to 0.24                   | NA                              |

|                                |    |    |                 |        |                |        |        |                |                |                |
|--------------------------------|----|----|-----------------|--------|----------------|--------|--------|----------------|----------------|----------------|
| <i>Cephalophus natalensis</i>  | 1  | 1  | small_herbivore | 0.098  | nocturnal_only | -0.649 | 0.4680 | -1.16 to -1.16 | 0.01 to 0.01   | -0.12 to -0.12 |
| <i>Cervus elaphus</i>          | 30 | 18 | large_herbivore | -0.885 | catheмерal     | 0.557  | 0.4897 | -1.51 to 2.05  | -2.08 to 2.22  | -0.56 to 0.64  |
| <i>Cervus nippon</i>           | 3  | NA | large_herbivore | -0.885 | catheмерal     | 0.557  | 0.4519 | -0.65 to 1.23  | 0.5 to 3.44    | NA             |
| <i>Chlorocebus pygerythrus</i> | 2  | 2  | small_omnivore  | 1.081  | diurnal_only   | -0.046 | 0.4884 | -1.16 to -1.03 | 0.07 to 0.11   | -1.4 to -0.11  |
| <i>Civettictis civetta</i>     | 1  | 1  | small_carnivore | 2.064  | nocturnal_only | 0.557  | 0.3846 | -1.03 to -1.03 | 0.01 to 0.01   | -0.02 to -0.02 |
| <i>Conepatus chinga</i>        | 1  | NA | small_carnivore | -0.885 | nocturnal_only | -0.046 | 0.3573 | -0.62 to -0.62 | -0.69 to -0.69 | NA             |
| <i>Conepatus leuconotus</i>    | 1  | NA | small_omnivore  | -0.885 | nocturnal_only | -0.046 | 0.3491 | -0.87 to -0.87 | 1.3 to 1.3     | NA             |
| <i>Connochaetes taurinus</i>   | 2  | 1  | large_herbivore | -0.885 | catheмерal     | -0.649 | 0.4951 | -1.16 to -1.03 | -0.78 to 1.72  | -0.41 to -0.41 |
| <i>Crocota crocuta</i>         | 2  | 1  | large_carnivore | -0.885 | catheмерal     | -0.649 | 0.455  | -1.16 to -1.03 | -0.5 to 0.69   | -0.04 to -0.04 |
| <i>Cuniculus paca</i>          | 2  | 2  | small_herbivore | 1.081  | nocturnal_only | -1.253 | 0.3731 | -1.44 to -1.19 | -0.25 to 0.32  | -0.04 to 0     |
| <i>Cynomys ludovicianus</i>    | 1  | 1  | small_herbivore | -0.885 | diurnal_only   | -0.046 | 0.2518 | -1.25 to -1.25 | -1.04 to -1.04 | 0.15 to 0.15   |
| <i>Dama dama</i>               | 9  | 3  | large_herbivore | -0.885 | catheмерal     | -0.046 | 0.4770 | -0.83 to 1.24  | -0.87 to 2.31  | -0.01 to 1.29  |
| <i>Dasyprocta fuliginosa</i>   | 1  | 1  | small_herbivore | 0.098  | catheмерal     | -1.253 | 0.3712 | -1.44 to -1.44 | -0.39 to -0.39 | 0.67 to 0.67   |
| <i>Dasyprocta punctata</i>     | 1  | 1  | small_herbivore | 0.098  | catheмерal     | -0.046 | 0.3773 | -1.19 to -1.19 | 0.6 to 0.6     | 0.1 to 0.1     |
| <i>Dasypus novemcinctus</i>    | 15 | 7  | small_carnivore | -0.885 | nocturnal_only | 1.161  | 0.2628 | -1.44 to 1.46  | -2.61 to 1.13  | -0.3 to 0.1    |
| <i>Didelphis marsupialis</i>   | 2  | 2  | small_omnivore  | 2.064  | nocturnal_only | -0.649 | 0.2620 | -1.44 to -1.19 | -0.26 to 0.15  | 0 to 0         |
| <i>Didelphis virginiana</i>    | 41 | 19 | small_omnivore  | 2.064  | nocturnal_only | -0.046 | 0.2745 | -1.45 to 2.05  | -3.01 to 2.97  | -0.13 to 0.09  |
| <i>Eira barbara</i>            | 2  | NA | small_carnivore | -0.885 | catheмерal     | -0.649 | 0.4369 | -1.44 to -1.19 | -1.04 to -0.21 | NA             |
| <i>Elephas maximus</i>         | 2  | 1  | large_herbivore | -0.885 | catheмерal     | -0.046 | 0.5677 | -0.86 to -0.85 | -0.6 to 2.5    | -0.69 to -0.69 |
| <i>Equus hemionus</i>          | 1  | NA | large_herbivore | -0.885 | catheмерal     | 0.557  | 0.4990 | 0.16 to 0.16   | 0.13 to 0.13   | NA             |
| <i>Equus quagga</i>            | 2  | 2  | large_herbivore | -0.885 | catheмерal     | -0.046 | 0.5057 | -1.16 to -1.03 | 0.22 to 0.32   | 0.11 to 0.58   |
| <i>Erethizon dorsatum</i>      | 15 | 1  | small_herbivore | 0.098  | nocturnal_only | -0.046 | 0.355  | -1.45 to 2.19  | -2.61 to 2.03  | -0.1 to -0.1   |
| <i>Felis silvestris</i>        | 11 | 4  | small_carnivore | -0.885 | catheмерal     | 1.161  | 0.4265 | -1.03 to 1.01  | -1.86 to 1.77  | -0.07 to 0.05  |
| <i>Galictis vittata</i>        | 1  | NA | small_carnivore | 2.064  | catheмерal     | -0.649 | 0.4145 | -1.19 to -1.19 | -1.13 to -1.13 | NA             |
| <i>Gazella dorcas</i>          | 1  | NA | large_herbivore | 0.098  | catheмерal     | -1.253 | 0.3976 | 0.16 to 0.16   | 3.62 to 3.62   | NA             |

|                                 |    |    |                 |        |                |        |        |                |                |                |
|---------------------------------|----|----|-----------------|--------|----------------|--------|--------|----------------|----------------|----------------|
| <i>Gazella gazella</i>          | 1  | NA | large_herbivore | -0.885 | catheMERal     | -0.046 | 0.4141 | 0.16 to 0.16   | -1.66 to -1.66 | NA             |
| <i>Giraffa camelopardalis</i>   | 2  | 2  | large_herbivore | -0.885 | catheMERal     | -0.046 | 0.4752 | -1.16 to -1.03 | -0.11 to 0.28  | -0.17 to 0.18  |
| <i>Gulo gulo</i>                | 5  | 1  | small_carnivore | 2.064  | nocturnal_only | 0.557  | 0.4648 | -1.49 to -1.28 | -1.09 to 2.02  | 0.45 to 0.45   |
| <i>Helarctos malayanus</i>      | 3  | NA | large_omnivore  | 1.081  | nocturnal_only | -0.046 | 0.5491 | -0.92 to -0.85 | -0.71 to 0.61  | NA             |
| <i>Hemigalus derbyanus</i>      | 3  | 1  | small_carnivore | -0.885 | nocturnal_only | -1.253 | 0.3828 | -0.92 to -0.85 | -0.79 to 1.52  | -0.01 to -0.01 |
| <i>Herpailurus yagouaroundi</i> | 1  | NA | small_carnivore | -0.885 | catheMERal     | 0.557  | 0.4226 | -1.44 to -1.44 | -1.44 to -1.44 | NA             |
| <i>Herpestes brachyurus</i>     | 2  | NA | small_carnivore | 1.081  | catheMERal     | -1.253 | 0.3493 | -0.86 to -0.85 | 0.29 to 0.79   | NA             |
| <i>Herpestes ichneumon</i>      | 2  | NA | small_carnivore | 1.081  | catheMERal     | 0.557  | 0.4014 | -0.1 to 0.16   | -2.51 to -1.37 | NA             |
| <i>Herpestes semitorquatus</i>  | 1  | NA | small_carnivore | 1.081  | catheMERal     | -1.253 | 0.3851 | -0.86 to -0.86 | 0.7 to 0.7     | NA             |
| <i>Hippopotamus amphibius</i>   | 2  | 1  | large_herbivore | -0.885 | nocturnal_only | 1.161  | 0.436  | -1.16 to -1.03 | -1.12 to -0.55 | -0.03 to -0.03 |
| <i>Hippotragus niger</i>        | 1  | NA | large_herbivore | -0.885 | diurnal_only   | -0.649 | 0.4578 | -1.03 to -1.03 | 0.75 to 0.75   | NA             |
| <i>Hyaena hyaena</i>            | 1  | NA | large_omnivore  | -0.885 | catheMERal     | -0.649 | 0.4415 | 0.16 to 0.16   | 1.99 to 1.99   | NA             |
| <i>Hystrix africaeaustralis</i> | 2  | 2  | small_herbivore | 0.098  | nocturnal_only | 0.557  | 0.3757 | -1.16 to -1.03 | -1.27 to 0.32  | 0.04 to 0.09   |
| <i>Hystrix brachyura</i>        | 2  | NA | small_herbivore | 0.098  | nocturnal_only | -0.046 | 0.4076 | -0.92 to -0.86 | -0.51 to 1.56  | NA             |
| <i>Hystrix crassispinis</i>     | 2  | 1  | small_herbivore | 0.098  | nocturnal_only | -1.253 | 0.3450 | -0.86 to -0.85 | -1.01 to 1.05  | 0.01 to 0.01   |
| <i>Hystrix cristata</i>         | 2  | 2  | small_herbivore | 0.098  | nocturnal_only | 1.764  | 0.3847 | -0.04 to 0.99  | -0.08 to 0.12  | -0.02 to 0.01  |
| <i>Hystrix indica</i>           | 1  | 1  | small_herbivore | 0.098  | nocturnal_only | 0.557  | 0.3915 | 0.16 to 0.16   | 0.19 to 0.19   | -0.03 to -0.03 |
| <i>Ichneumia albicauda</i>      | 2  | 2  | small_carnivore | -0.885 | nocturnal_only | 1.161  | 0.3979 | -1.16 to -1.03 | -0.57 to 0.19  | -0.02 to -0.01 |
| <i>Kobus ellipsiprymnus</i>     | 2  | 1  | large_herbivore | -0.885 | catheMERal     | 0.557  | 0.4762 | -1.16 to -1.03 | -1.4 to 0.16   | 0.03 to 0.03   |
| <i>Leopardus pardalis</i>       | 2  | 2  | small_carnivore | 0.098  | nocturnal_only | -0.046 | 0.4523 | -1.44 to -1.19 | -0.2 to 0.54   | -0.01 to 0.16  |
| <i>Leopardus wiedii</i>         | 1  | NA | small_carnivore | 0.098  | catheMERal     | -0.046 | 0.4264 | -1.44 to -1.44 | -0.76 to -0.76 | NA             |
| <i>Lepus americanus</i>         | 17 | 9  | small_herbivore | -0.885 | nocturnal_only | -0.649 | 0.3092 | -1.51 to 1.57  | -1.65 to 2.25  | -0.06 to 0.26  |
| <i>Lepus californicus</i>       | 5  | 1  | small_herbivore | -0.885 | nocturnal_only | 1.161  | 0.3333 | -1.25 to 0.17  | -2.86 to -0.51 | -0.18 to -0.18 |
| <i>Lepus capensis</i>           | 1  | NA | small_herbivore | -0.885 | nocturnal_only | 0.557  | 0.3089 | 0.16 to 0.16   | 2.11 to 2.11   | NA             |
| <i>Lepus corsicanus</i>         | 1  | 1  | small_herbivore | -0.885 | nocturnal_only | 0.557  | 0.3181 | 0.99 to 0.99   | 0.61 to 0.61   | -0.13 to -0.13 |

|                            |    |    |                 |        |                |        |        |                |                |                |
|----------------------------|----|----|-----------------|--------|----------------|--------|--------|----------------|----------------|----------------|
| <i>Lepus europaeus</i>     | 23 | 14 | small_herbivore | -0.885 | nocturnal_only | -0.046 | 0.3200 | -1.03 to 1.46  | -1.54 to 3.43  | -0.11 to 1.15  |
| <i>Lepus granatensis</i>   | 1  | 1  | small_herbivore | -0.885 | nocturnal_only | 0.557  | 0.3131 | -0.1 to -0.1   | -0.47 to -0.47 | -0.06 to -0.06 |
| <i>Lepus timidus</i>       | 1  | NA | small_herbivore | -0.885 | nocturnal_only | 1.161  | 0.3386 | 0.58 to 0.58   | 2.16 to 2.16   | NA             |
| <i>Lepus townsendii</i>    | 4  | 1  | small_herbivore | -0.885 | nocturnal_only | -0.046 | 0.3213 | -1.3 to 1.57   | -3.12 to 0.23  | -0.21 to -0.21 |
| <i>Lepus victoriae</i>     | 2  | 2  | small_herbivore | -0.885 | nocturnal_only | -0.649 | 0.3113 | -1.16 to -1.03 | -0.49 to 0.12  | 0.01 to 0.08   |
| <i>Lontra canadensis</i>   | 10 | NA | small_carnivore | -0.885 | catheMERal     | 1.161  | 0.4460 | -1.49 to 1.58  | -1.55 to 1.31  | NA             |
| <i>Loxodonta africana</i>  | 2  | 2  | large_herbivore | -0.885 | catheMERal     | 0.007  | 0.5590 | -1.16 to -1.03 | -0.31 to 0.26  | -0.15 to 0.18  |
| <i>Lutra lutra</i>         | 2  | NA | small_carnivore | 1.081  | catheMERal     | 1.161  | 0.4249 | -0.83 to 1.01  | -1 to -0.78    | NA             |
| <i>Lycalopex culpaeus</i>  | 2  | 1  | small_omnivore  | -0.885 | nocturnal_only | 1.161  | 0.4197 | -0.62 to 1.2   | -0.68 to 1.04  | 0.25 to 0.25   |
| <i>Lycalopex griseus</i>   | 2  | 2  | small_omnivore  | 1.081  | nocturnal_only | -0.046 | 0.4172 | -0.62 to 1.2   | -0.05 to 1.33  | -0.19 to -0.1  |
| <i>Lycaon pictus</i>       | 2  | 1  | large_carnivore | -0.885 | catheMERal     | 0.557  | 0.485  | -1.16 to -1.03 | -2.08 to -1    | 0.15 to 0.15   |
| <i>Lynx canadensis</i>     | 5  | 4  | small_carnivore | 0.098  | nocturnal_only | -0.649 | 0.4648 | -1.51 to -1.28 | -0.77 to 0.41  | -0.27 to 0.09  |
| <i>Lynx lynx</i>           | 8  | 2  | large_carnivore | -0.885 | nocturnal_only | 1.161  | 0.4303 | -1.03 to 1.23  | -3.62 to 1.27  | 0.06 to 0.08   |
| <i>Lynx rufus</i>          | 44 | 8  | small_carnivore | -0.885 | nocturnal_only | 0.557  | 0.4481 | -1.51 to 2.19  | -2.78 to 2.94  | -0.28 to 0.27  |
| <i>Macaca fascicularis</i> | 3  | NA | small_carnivore | 0.098  | diurnal_only   | -0.046 | 0.4968 | -0.92 to -0.85 | -1.38 to 3.54  | NA             |
| <i>Macaca nemestrina</i>   | 3  | 2  | small_herbivore | -0.885 | diurnal_only   | -0.649 | 0.5264 | -0.92 to -0.85 | -0.21 to 1.13  | -1.44 to 0.32  |
| <i>Marmota caligata</i>    | 4  | 2  | small_herbivore | 1.081  | diurnal_only   | -0.649 | 0.3249 | -1.51 to -1.45 | -0.44 to 0.59  | -0.02 to 0.22  |
| <i>Marmota monax</i>       | 11 | 1  | small_omnivore  | 1.081  | diurnal_only   | -0.046 | 0.3283 | 0.34 to 1.58   | -1.55 to 2.73  | 0.61 to 0.61   |
| <i>Martes caurina</i>      | 1  | NA | small_carnivore | 2      | catheMERal     | 1      | NA     | -1.45 to -1.45 | 2.77 to 2.77   | NA             |
| <i>Martes foina</i>        | 13 | 6  | small_carnivore | 1.081  | catheMERal     | 0.557  | 0.4140 | -0.65 to 1.46  | -3.58 to 1.77  | -0.04 to 0.13  |
| <i>Martes martes</i>       | 13 | 3  | small_carnivore | 0.098  | nocturnal_only | -0.649 | 0.4236 | -1.28 to 1.46  | -2.15 to 1.66  | -0.69 to -0.09 |
| <i>Mazama americana</i>    | 2  | 2  | large_herbivore | 0.098  | catheMERal     | -1.253 | 0.4529 | -1.44 to -1.19 | -0.13 to 0.55  | 0.3 to 0.32    |
| <i>Mazama nemorivaga</i>   | 1  | NA | small_herbivore | 1.081  | catheMERal     | -0.649 | 0.4293 | -1.44 to -1.44 | 0.16 to 0.16   | NA             |
| <i>Meles meles</i>         | 23 | 13 | small_omnivore  | 2.064  | nocturnal_only | 1.161  | 0.4250 | -1.03 to 1.46  | -2.82 to 3.01  | -0.06 to 0.09  |
| <i>Mellivora capensis</i>  | 2  | 1  | small_omnivore  | 1.081  | catheMERal     | 0.557  | 0.4728 | -1.16 to -1.03 | -0.66 to -0.52 | -0.46 to -0.46 |

|                                 |    |    |                 |        |                |        |        |                |                |                |
|---------------------------------|----|----|-----------------|--------|----------------|--------|--------|----------------|----------------|----------------|
| <i>Mephitis mephitis</i>        | 38 | 6  | small_omnivore  | 2.064  | nocturnal_only | 0.557  | 0.3037 | -1.51 to 2.19  | -2.4 to 2.34   | -0.14 to 0.16  |
| <i>Mungos mungo</i>             | 2  | NA | small_carnivore | 0.098  | catheMERal     | -0.649 | 0.3339 | -1.16 to -1.03 | -0.87 to 1.59  | NA             |
| <i>Muntiacus atherodes</i>      | 2  | 1  | small_herbivore | 0.098  | catheMERal     | -0.649 | 0.4614 | -0.92 to -0.86 | -0.27 to -0.12 | 0.22 to 0.22   |
| <i>Muntiacus muntjak</i>        | 3  | 1  | small_herbivore | 0.098  | catheMERal     | -0.649 | 0.4734 | -0.92 to -0.85 | 0.1 to 1.57    | -0.21 to -0.21 |
| <i>Mydaus javanensis</i>        | 1  | NA | small_carnivore | 0.098  | nocturnal_only | 0.557  | 0.3841 | -0.86 to -0.86 | 1.62 to 1.62   | NA             |
| <i>Mydaus marchei</i>           | 1  | NA | small_carnivore | 0.098  | catheMERal     | 0.557  | 0.3495 | -0.85 to -0.85 | -1.87 to -1.87 | NA             |
| <i>Myocastor coypus</i>         | 2  | NA | small_herbivore | -0.885 | nocturnal_only | -0.649 | 0.3378 | 1.01 to 1.2    | -0.63 to 1.21  | NA             |
| <i>Myrmecophaga tridactyla</i>  | 1  | NA | large_carnivore | -0.885 | catheMERal     | 1.161  | 0.4305 | -1.44 to -1.44 | -0.33 to -0.33 | NA             |
| <i>Nasua narica</i>             | 1  | NA | small_omnivore  | 0.098  | diurnal_only   | -1.253 | 0.4603 | -1.19 to -1.19 | -0.77 to -0.77 | NA             |
| <i>Neofelis diardi</i>          | 1  | NA | large_carnivore | -0.885 | catheMERal     | -1.253 | 0.4256 | -0.86 to -0.86 | -0.17 to -0.17 | NA             |
| <i>Neofelis nebulosa</i>        | 2  | NA | small_carnivore | -0.885 | catheMERal     | -1.253 | 0.4318 | -0.92 to -0.85 | -0.07 to 0.98  | NA             |
| <i>Nesotragus moschatus</i>     | 1  | NA | small_herbivore | 0.098  | catheMERal     | -0.649 | 0.4017 | -1.16 to -1.16 | -1.63 to -1.63 | NA             |
| <i>Nyctereutes procyonoides</i> | 2  | NA | small_omnivore  | 1.081  | nocturnal_only | 0.557  | 0.4054 | -0.65 to 0.06  | -0.2 to 0.73   | NA             |
| <i>Odocoileus hemionus</i>      | 29 | 25 | large_herbivore | -0.885 | catheMERal     | 3.574  | 0.4638 | -1.51 to 2.19  | -0.98 to 1.27  | -1.37 to 0.66  |
| <i>Odocoileus virginianus</i>   | 53 | 51 | large_herbivore | -0.885 | catheMERal     | 3.574  | 0.4540 | -1.51 to 1.67  | -1.13 to 1.69  | -1.51 to 0.65  |
| <i>Oreamnos americanus</i>      | 4  | 1  | large_herbivore | -0.885 | catheMERal     | 0.557  | 0.4471 | -1.51 to -1.4  | -0.85 to 2.59  | -0.36 to -0.36 |
| <i>Oreotragus oreotragus</i>    | 1  | NA | small_herbivore | -0.885 | catheMERal     | -0.046 | 0.4296 | -1.03 to -1.03 | 0.14 to 0.14   | NA             |
| <i>Orycteropus afer</i>         | 1  | NA | large_carnivore | -0.885 | catheMERal     | 0.557  | 0.4252 | -1.03 to -1.03 | 1.93 to 1.93   | NA             |
| <i>Oryctolagus cuniculus</i>    | 7  | 3  | small_herbivore | -0.885 | nocturnal_only | 0.557  | 0.3100 | -1.03 to 1.24  | -1.76 to 1.05  | -0.34 to 0.14  |
| <i>Ovis ammon</i>               | 1  | 1  | large_herbivore | -0.885 | catheMERal     | 0.557  | 0.3925 | 0.3 to 0.3     | -0.14 to -0.14 | 0.18 to 0.18   |
| <i>Ovis canadensis</i>          | 4  | 1  | large_herbivore | -0.885 | catheMERal     | -0.649 | 0.4606 | -1.45 to -0.25 | -1.06 to 2.76  | -0.79 to -0.79 |
| <i>Ovis orientalis</i>          | 1  | NA | large_herbivore | -0.885 | diurnal_only   | -0.649 | NA     | 0.06 to 0.06   | -1.62 to -1.62 | NA             |
| <i>Paguma larvata</i>           | 1  | NA | small_omnivore  | 1.081  | nocturnal_only | -0.046 | 0.4113 | -0.92 to -0.92 | -0.28 to -0.28 | NA             |
| <i>Panthera leo</i>             | 2  | 2  | large_carnivore | -0.885 | catheMERal     | 0.557  | 0.459  | -1.16 to -1.03 | -0.22 to 0.21  | -0.08 to 0     |
| <i>Panthera onca</i>            | 2  | 1  | large_carnivore | -0.885 | catheMERal     | 1.764  | 0.447  | -1.44 to -1.19 | -0.46 to -0.22 | -0.19 to -0.19 |

|                                 |    |    |                 |        |                |        |        |                |                |                |
|---------------------------------|----|----|-----------------|--------|----------------|--------|--------|----------------|----------------|----------------|
| <i>Panthera pardus</i>          | 2  | 2  | large_carnivore | -0.885 | nocturnal_only | 1.764  | 0.4502 | -1.16 to -1.03 | -0.52 to 0     | -0.08 to -0.03 |
| <i>Papio ursinus</i>            | 1  | 1  | small_herbivore | 1.081  | diurnal_only   | 1.764  | 0.5392 | -1.03 to -1.03 | 0.56 to 0.56   | -0.54 to -0.54 |
| <i>Pardofelis marmorata</i>     | 3  | NA | large_carnivore | -0.885 | nocturnal_only | -1.253 | 0.4370 | -0.92 to -0.85 | -1.09 to 2.03  | NA             |
| <i>Pecari tajacu</i>            | 3  | 2  | large_omnivore  | 0.098  | catheмерal     | 1.161  | 0.4633 | -1.44 to 0.17  | 0.03 to 1.41   | 0.28 to 0.46   |
| <i>Pekania pennanti</i>         | 10 | NA | small_carnivore | 2      | catheмерal     | 1      | NA     | -1.27 to 1.45  | -3.08 to 0.67  | NA             |
| <i>Phacochoerus africanus</i>   | 2  | 2  | large_omnivore  | -0.885 | diurnal_only   | -0.046 | 0.4278 | -1.16 to -1.03 | -0.63 to -0.37 | 0.33 to 0.81   |
| <i>Potamochoerus larvatus</i>   | 1  | NA | large_omnivore  | 0.098  | nocturnal_only | -0.649 | 0.4495 | -1.16 to -1.16 | 1.08 to 1.08   | NA             |
| <i>Priodontes maximus</i>       | 1  | NA | large_carnivore | -0.885 | nocturnal_only | -0.046 | 0.4224 | -1.44 to -1.44 | 0.35 to 0.35   | NA             |
| <i>Prionailurus bengalensis</i> | 3  | NA | small_carnivore | -0.885 | catheмерal     | -0.046 | 0.4100 | -0.92 to -0.85 | -0.96 to 1.11  | NA             |
| <i>Procyon lotor</i>            | 58 | 37 | small_omnivore  | 2.064  | nocturnal_only | -1.253 | 0.4371 | -1.45 to 2.19  | -2.07 to 2.37  | -0.24 to 0.17  |
| <i>Pteronura brasiliensis</i>   | 1  | NA | large_carnivore | 0.098  | diurnal_only   | -0.046 | 0.4486 | -1.44 to -1.44 | -0.76 to -0.76 | NA             |
| <i>Pudu puda</i>                | 2  | NA | small_herbivore | -0.885 | catheмерal     | -1.253 | 0.4516 | -0.62 to 1.2   | -0.75 to 2.41  | NA             |
| <i>Puma concolor</i>            | 19 | 5  | large_carnivore | -0.885 | catheмерal     | 1.161  | 0.4536 | -1.51 to 0.3   | -1.81 to 1.77  | 0 to 0.19      |
| <i>Raphicerus campestris</i>    | 1  | 1  | small_herbivore | -0.885 | catheмерal     | -0.046 | 0.4200 | -1.03 to -1.03 | 0.23 to 0.23   | -0.12 to -0.12 |
| <i>Redunca arundinum</i>        | 2  | NA | large_herbivore | -0.885 | catheмерal     | 0.557  | 0.4492 | -1.16 to -1.03 | -2.26 to -1.8  | NA             |
| <i>Rhynchogale melleri</i>      | 1  | NA | small_carnivore | 1.081  | nocturnal_only | -0.046 | 0.3715 | -1.03 to -1.03 | 2.26 to 2.26   | NA             |
| <i>Rupicapra rupicapra</i>      | 6  | 2  | large_herbivore | -0.885 | catheмерal     | 0.557  | 0.4553 | -1.03 to 0.84  | -0.51 to 1.92  | -0.2 to 0.54   |
| <i>Rusa unicolor</i>            | 2  | 2  | large_herbivore | -0.885 | catheмерal     | 1.764  | 0.4669 | -0.86 to -0.85 | -0.19 to 0.7   | -0.72 to 0.39  |
| <i>Smutsia temminckii</i>       | 1  | NA | small_carnivore | -0.885 | nocturnal_only | -0.046 | 0.414  | -1.03 to -1.03 | -0.62 to -0.62 | NA             |
| <i>Speothos venaticus</i>       | 1  | NA | small_carnivore | -0.885 | catheмерal     | 1.161  | 0.4294 | -1.44 to -1.44 | 0.63 to 0.63   | NA             |
| <i>Sus barbatus</i>             | 3  | 3  | large_omnivore  | -0.885 | catheмерal     | -1.253 | 0.4349 | -0.92 to -0.85 | -0.47 to 0.44  | -0.72 to 1.84  |
| <i>Sus scrofa</i>               | 34 | 20 | large_omnivore  | -0.885 | catheмерal     | 2.367  | 0.4343 | -1.09 to 1.24  | -4.94 to 2.6   | -0.5 to 0.44   |
| <i>Sylvicapra grimmia</i>       | 2  | 2  | small_herbivore | 0.098  | nocturnal_only | 1.764  | 0.4416 | -1.16 to -1.03 | -0.54 to 0.41  | -0.02 to 0.08  |
| <i>Sylvilagus aquaticus</i>     | 1  | NA | small_herbivore | -0.885 | catheмерal     | 0.557  | 0.2983 | 1.46 to 1.46   | 0.92 to 0.92   | NA             |
| <i>Sylvilagus floridanus</i>    | 37 | 12 | small_herbivore | -0.885 | catheмерal     | 3.574  | 0.2860 | -1.45 to 2.05  | -4.51 to 2.52  | -0.31 to 0.43  |

|                                 |    |    |                 |        |                |        |        |                |                |                |
|---------------------------------|----|----|-----------------|--------|----------------|--------|--------|----------------|----------------|----------------|
| <i>Sylvilagus palustris</i>     | 1  | NA | small_herbivore | -0.885 | catheMERal     | 1.161  | 0.2734 | -1.45 to -1.45 | 3.04 to 3.04   | NA             |
| <i>Syncerus caffer</i>          | 2  | 1  | large_herbivore | -0.885 | catheMERal     | 1.161  | 0.4760 | -1.16 to -1.03 | -0.86 to -0.72 | 0.82 to 0.82   |
| <i>Tamandua mexicana</i>        | 1  | NA | small_carnivore | -0.885 | catheMERal     | -0.649 | 0.4159 | -1.19 to -1.19 | 1.53 to 1.53   | NA             |
| <i>Tamandua tetradactyla</i>    | 1  | NA | small_carnivore | -0.885 | catheMERal     | -0.046 | 0.3903 | -1.44 to -1.44 | -0.06 to -0.06 | NA             |
| <i>Tapirus bairdii</i>          | 1  | 1  | large_herbivore | -0.885 | nocturnal_only | 0.557  | 0.3809 | -1.19 to -1.19 | -0.13 to -0.13 | -0.01 to -0.01 |
| <i>Tapirus terrestris</i>       | 1  | NA | large_herbivore | -0.885 | nocturnal_only | 1.161  | 0.4216 | -1.44 to -1.44 | 0.07 to 0.07   | NA             |
| <i>Taxidea taxus</i>            | 12 | NA | small_carnivore | 0.098  | nocturnal_only | -0.649 | 0.4429 | -1.51 to 1.47  | -2.34 to 1.42  | NA             |
| <i>Tayassu pecari</i>           | 1  | NA | large_omnivore  | 1.081  | catheMERal     | 0.557  | 0.4806 | -1.19 to -1.19 | 1.64 to 1.64   | NA             |
| <i>Tragelaphus angasii</i>      | 2  | 2  | large_herbivore | -0.885 | catheMERal     | -0.046 | 0.4709 | -1.16 to -1.03 | 0.09 to 0.46   | 0.12 to 0.18   |
| <i>Tragelaphus scriptus</i>     | 2  | 1  | large_herbivore | -0.885 | catheMERal     | -0.649 | 0.4697 | -1.16 to -1.03 | -0.95 to 0.73  | 0.06 to 0.06   |
| <i>Tragelaphus strepsiceros</i> | 2  | 2  | large_herbivore | -0.885 | catheMERal     | -0.046 | 0.4855 | -1.16 to -1.03 | -0.69 to 0.76  | -0.6 to -0.1   |
| <i>Tragulus javanicus</i>       | 1  | 1  | small_herbivore | 0.098  | nocturnal_only | -0.649 | 0.3699 | -0.92 to -0.92 | -0.24 to -0.24 | -0.61 to -0.61 |
| <i>Tragulus napu</i>            | 2  | 1  | small_herbivore | 0.098  | nocturnal_only | -0.649 | 0.3528 | -0.92 to -0.85 | 0.43 to 0.54   | -0.07 to -0.07 |
| <i>Trichys fasciculata</i>      | 3  | NA | small_herbivore | 0.098  | nocturnal_only | -1.253 | 0.3487 | -0.92 to -0.85 | -0.83 to 2.12  | NA             |
| <i>Urocyon cinereoargenteus</i> | 24 | 4  | small_omnivore  | 2.064  | catheMERal     | -0.649 | 0.4483 | -1.27 to 1.47  | -3.1 to 1.53   | 0 to 0.26      |
| <i>Ursus americanus</i>         | 26 | 12 | large_omnivore  | 0.098  | catheMERal     | 0.557  | 0.4763 | -1.51 to 1.99  | -3.38 to 3.38  | -1.5 to 0.73   |
| <i>Ursus arctos</i>             | 14 | 9  | large_omnivore  | 0.098  | catheMERal     | 1.161  | 0.4748 | -1.49 to 0.17  | -1.28 to 1.25  | -0.84 to 0.51  |
| <i>Viverra zibetha</i>          | 3  | 2  | small_omnivore  | 0.098  | catheMERal     | -0.649 | 0.3645 | -0.92 to -0.85 | -0.45 to 1.14  | -0.2 to 0.05   |
| <i>Vulpes vulpes</i>            | 56 | 34 | small_omnivore  | 0.098  | catheMERal     | 1.764  | 0.4547 | -1.45 to 2.19  | -2.23 to 2.72  | -0.19 to 0.63  |

**Supplementary Table 2. Global model output for changes in amount of animal activity.** Coefficient estimates from global model using change in the number of species detections as the response term. Test statistics and p-values derived from the default two-tailed Wald-type test using the *rmv.mv* function in the metafor R package (multiple comparisons were not performed). Significant contrasts shaded in dark grey ( $p < 0.05$ ), marginal effects ( $p < 0.10$ ) in light grey.

| Effect contrasts                                                                                            | Estimate | Standard error | Test statistic | P-value |
|-------------------------------------------------------------------------------------------------------------|----------|----------------|----------------|---------|
| Intercept (comparison = season, trophic group = large herbivore, diel activity = diurnal, habitat = closed) | 0.382    | 0.192          | 1.984          | 0.047   |
| Comparison = year                                                                                           | 0.005    | 0.110          | 0.044          | 0.965   |
| Trophic group = large carnivore                                                                             | -0.224   | 0.096          | -2.334         | 0.020   |
| Trophic group = large omnivore                                                                              | -0.185   | 0.083          | -2.222         | 0.026   |
| Trophic group = small carnivore                                                                             | -0.315   | 0.076          | -4.133         | 0.000   |
| Trophic group = small herbivore                                                                             | -0.153   | 0.086          | -1.780         | 0.075   |
| Trophic group = small omnivore                                                                              | -0.207   | 0.110          | -1.881         | 0.060   |
| Activity cycle = cathemeral                                                                                 | -0.182   | 0.151          | -1.208         | 0.227   |
| Activity cycle = nocturnal                                                                                  | -0.207   | 0.149          | -1.388         | 0.165   |
| Diet breadth                                                                                                | 0.020    | 0.039          | 0.500          | 0.617   |
| Habitat breadth                                                                                             | -0.017   | 0.020          | -0.854         | 0.393   |
| Stringency                                                                                                  | 0.039    | 0.039          | 0.988          | 0.323   |
| HMI                                                                                                         | 0.078    | 0.040          | 1.934          | 0.053   |
| Habitat closure = open                                                                                      | -0.172   | 0.087          | -1.981         | 0.048   |



**Supplementary Table 3. Model selection for interactions and non-linear effects in models of amount of animal activity.** Where: ‘global model’ represents the additive model shown in Table S2; df = degrees of freedom; logLik = Log likelihood; AICc = Akaike information criterion corrected for small sample size;  $\Delta$ AICc = change in AICc from the global model; wAIC = model weight. Models shaded in grey represent the best-supported model(s) discussed in the main text.

| Model terms                                    | df | logLik  | AICc   | $\Delta$ AICc | wAICc |
|------------------------------------------------|----|---------|--------|---------------|-------|
| Global model + HMI * Trophic group             | 22 | -1459.8 | 2964.6 | 0.00          | 0.82  |
| Global model                                   | 17 | -1467.4 | 2969.4 | 4.74          | 0.08  |
| Global model + Habitat closure * Trophic group | 22 | -1462.8 | 2970.5 | 5.88          | 0.04  |
| Global model + HMI <sup>2</sup>                | 18 | -1467.2 | 2971.1 | 6.47          | 0.03  |
| Global model + Habitat closure* HMI            | 18 | -1467.3 | 2971.2 | 6.63          | 0.03  |

**Supplementary Table 4. Model selection for effects of hunting on changes in amount of animal activity.** Where: ‘global model’ represents the additive model shown in Supplementary Table 2; df = degrees of freedom; logLik = Log likelihood; AICc = Akaike information criterion corrected for small sample size;  $\Delta$ AICc = change in AICc from the global model; wAICc = relative weight of support for the candidate model. Models shaded in grey represent the best-supported model(s) discussed in the main text.

| Model                                           | df | AICc    | $\Delta$ AICc | wAICc |
|-------------------------------------------------|----|---------|---------------|-------|
| Global model                                    | 17 | 2701.23 | 0.00          | 0.327 |
| Global model + hunting status                   | 18 | 2701.24 | 0.01          | 0.326 |
| Global model + hunting status * HMI             | 19 | 2701.98 | 0.75          | 0.225 |
| Global model + hunting status * habitat closure | 19 | 2703.27 | 2.04          | 0.118 |
| Global model + hunting status * trophic group   | 23 | 2710.14 | 8.91          | 0.004 |

**Supplementary Table 5. Model selection for effects of empirical magnitude of change in human activity (derived from camera traps), and relative brain size, on changes in amount of animal activity.** Models shaded in grey represent the best-supported model(s) discussed in the main text. Where: ‘global model’ represents the additive model shown in Supplementary Table 2; *df* = degrees of freedom; *logLik* = Log likelihood; *AICc* = Akaike information criterion corrected for small sample size;  $\Delta AICc$  = change in *AICc* from the global model; *wAICc* = relative weight of support for the candidate model.

| Model selection tables                          | <i>df</i> | <i>AICc</i> | $\Delta AICc$ | <i>wAICc</i> |
|-------------------------------------------------|-----------|-------------|---------------|--------------|
| <i>A) Locally derived human activity change</i> |           |             |               |              |
| Global model                                    | 17        | 2484.1      | 0.00          | 0.73         |
| Global model + empirical human activity change  | 18        | 2486.1      | 2.01          | 0.27         |
| <i>B) Brain size</i>                            |           |             |               |              |
| Global model                                    | 17        | 2928.8      | 0.00          | 0.72         |
| Global model + relative brain size              | 18        | 2930.7      | 1.92          | 0.28         |

**Supplementary Table 6. Global model output for changes in timing of animal activity (nocturnality).** Coefficient estimates are from the global model using the risk ratio for the proportion of nocturnal detections as the response term. Test statistics and p-values were derived from the default two-tailed Wald-type test using the *rmv.mv* function in the metafor R package (multiple comparisons were not performed). Significant contrasts are shaded in dark grey ( $p < 0.05$ ).

| Effect contrasts                                                                                              | Estimate | Standard error | Test statistic | P-value |
|---------------------------------------------------------------------------------------------------------------|----------|----------------|----------------|---------|
| Intercept (comparison = season, trophic group = large herbivore, diel activity = nocturnal, habitat = closed) | -0.047   | 0.037          | -1.265         | 0.206   |
| Comparison = year                                                                                             | 0.067    | 0.031          | 2.123          | 0.034   |
| Trophic group = large carnivore                                                                               | 0.074    | 0.025          | 2.993          | 0.003   |
| Trophic group = large omnivore                                                                                | 0.018    | 0.027          | 0.644          | 0.520   |
| Trophic group = small carnivore                                                                               | 0.030    | 0.023          | 1.331          | 0.183   |
| Trophic group = small herbivore                                                                               | 0.017    | 0.022          | 0.794          | 0.427   |
| Trophic group = small omnivore                                                                                | 0.031    | 0.031          | 0.996          | 0.319   |
| Activity cycle = diurnal                                                                                      | 0.079    | 0.149          | 0.529          | 0.597   |
| Activity cycle = cathemeral                                                                                   | -0.014   | 0.016          | -0.903         | 0.367   |
| Diet breadth                                                                                                  | -0.008   | 0.009          | -0.875         | 0.382   |
| Habitat breadth                                                                                               | 0.001    | 0.006          | 0.226          | 0.821   |
| Stringency                                                                                                    | 0.003    | 0.011          | 0.245          | 0.807   |
| HMI                                                                                                           | 0.048    | 0.011          | 4.285          | 0.000   |
| Habitat closure = open                                                                                        | -0.036   | 0.024          | -1.496         | 0.135   |

**Supplementary Table 7. Model selection for interactions and non-linear effects for animal nocturnality model.** Where: ‘global model’ represents the additive model shown in Supplementary Table 6; df = degrees of freedom; logLik = Log likelihood; AICc = Akaike information criterion corrected for small sample size;  $\Delta$ AICc = change in AICc from the global model; wAICc = relative weight of support for the candidate model. Models shaded in grey represent the best-supported model(s) discussed in the main text.

| Model                                          | df | logLik | AICc   | $\Delta$ AICc | wAICc |
|------------------------------------------------|----|--------|--------|---------------|-------|
| Global model + HMI*Trophic group               | 22 | -61.40 | 168.92 | 0.00          | 0.99  |
| Global model + Habitat closure * Trophic group | 22 | -66.51 | 179.15 | 10.23         | 0.01  |
| Global model + Habitat closure* HMI            | 18 | -74.72 | 186.86 | 17.94         | 0.00  |
| Global model                                   | 17 | -76.66 | 188.60 | 19.67         | 0.00  |
| Global model + HMI <sup>2</sup>                | 18 | -75.77 | 188.96 | 20.03         | 0.00  |

**Supplementary Table S8. Model selection for effects of hunting on the animal nocturnality model.** Where: ‘global model’ represents the additive model shown in Supplementary Table 6; df = degrees of freedom; logLik = Log likelihood; AICc = Akaike information criterion corrected for small sample size;  $\Delta$ AICc = change in AICc from the global model; wAICc = relative weight of support for the candidate model. Models shaded in grey represent the best-supported model(s) discussed in the main text.

| Model                                     | df | AICc  | $\Delta$ AICc | wAICc |
|-------------------------------------------|----|-------|---------------|-------|
| Global + hunting status * HMI             | 19 | 246.7 | 0.00          | 0.75  |
| Global                                    | 17 | 250.5 | 3.83          | 0.11  |
| Global + hunting status                   | 18 | 251.2 | 4.49          | 0.08  |
| Global + hunting status * trophic group   | 23 | 253.0 | 6.30          | 0.03  |
| Global + hunting status * habitat closure | 19 | 253.1 | 6.38          | 0.03  |

**Supplementary Table 9. Model selection for effects of empirical magnitude of change in human activity (derived from camera traps) and relative brain size on animal nocturnality.** Where: *df* = degrees of freedom; *AICc* = Akaike information criterion corrected for small sample size;  $\Delta AICc$  = change in *AICc* from the global model; *wAICc* = relative weight of support for the candidate model. Models shaded in grey represent the best-supported model(s) discussed in the main text.

| Model selection tables                          | <i>df</i> | <i>AICc</i> | $\Delta AICc$ | <i>wAICc</i> |
|-------------------------------------------------|-----------|-------------|---------------|--------------|
| <i>A) Locally derived human activity change</i> |           |             |               |              |
| Global model                                    | 17        | 149.2       | 0.00          | 0.75         |
| Global model + empirical human activity change  | 18        | 151.3       | 2.16          | 0.25         |
| <i>B) Brain size</i>                            |           |             |               |              |
| Global model                                    | 17        | 188.6       | 0.00          | 0.74         |
| Global model + Brain size                       | 18        | 190.6       | 2.05          | 0.26         |

**Supplementary Table 10.** Details on camera trap projects and sampling periods included in the analyses of animal responses to changes in human activity.

| Project Identifier                  | Contact                         | Country  | Camera stations analyzed | Station spacing (km) | Bait use | Baited stations (%) | Period    | Treatment Period | Comparison | Start      | End        | Duration (days) |
|-------------------------------------|---------------------------------|----------|--------------------------|----------------------|----------|---------------------|-----------|------------------|------------|------------|------------|-----------------|
| 2C2T                                | francesca.cagnacci@fmach.it     | Italy    | 16                       | 0.37                 | Yes      | 100                 | Control   | High             | Year       | 2019-03-09 | 2019-05-03 | 55              |
|                                     |                                 |          |                          |                      |          |                     | Treatment | Low              | Year       | 2020-03-09 | 2020-05-03 | 55              |
| AL_Forest_Auburn                    | lepczyk@auburn.edu              | USA      | 39                       | 0.1                  | No       | -                   | Treatment | High             | Year       | 2020-10-11 | 2020-11-25 | 45              |
|                                     |                                 |          |                          |                      |          |                     | Control   | Low              | Year       | 2019-10-12 | 2019-11-06 | 25              |
| Allen Fort Hood                     | maxallen@illinois.edu           | USA      | 59                       | 0.92                 | Yes      | 66                  | Treatment | High             | Year       | 2020-04-04 | 2020-05-06 | 32              |
|                                     |                                 |          |                          |                      |          |                     | Control   | Low              | Year       | 2019-02-28 | 2019-04-08 | 39              |
| AZ_Desert_McDowell_Sonoran_Preserve | helen@mcowellsonoran.org        | USA      | 18                       | 0.79                 | No       | -                   | Treatment | Low              | Year       | 2020-09-10 | 2020-10-27 | 47              |
|                                     |                                 |          |                          |                      |          |                     | Control   | High             | Year       | 2019-08-26 | 2019-10-21 | 56              |
| Banff                               | jesse.whittington@canada.ca     | Canada   | 300                      | 2.67                 | No       | -                   | Control   | High             | Year       | 2019-03-19 | 2019-05-19 | 61              |
|                                     |                                 |          |                          |                      |          |                     | Treatment | Low              | Year       | 2020-03-19 | 2020-05-19 | 61              |
| BAPP                                | zaramcdonald@felidaefund.org    | USA      | 24                       | 1.77                 | No       | -                   | Control   | High             | Season     | 2020-06-01 | 2020-08-15 | 75              |
|                                     |                                 |          |                          |                      |          |                     | Treatment | Low              | Season     | 2020-03-01 | 2020-05-15 | 75              |
| BE_SPW_Gaume                        | valerie.dewaele@spw.wallonie.be | Belgium  | 98                       | 1.02                 | No       | -                   | Treatment | High             | Year       | 2020-03-13 | 2020-06-13 | 92              |
|                                     |                                 |          |                          |                      |          |                     | Control   | Low              | Year       | 2019-03-13 | 2019-06-13 | 92              |
| BFNP_01                             | marco.heurich@npv-bw.bayern.de  | Germany  | 84                       | 1.35                 | No       | -                   | Treatment | Low              | Season     | 2020-03-01 | 2020-04-30 | 60              |
|                                     |                                 |          |                          |                      |          |                     | Control   | High             | Season     | 2020-05-01 | 2020-06-30 | 60              |
| Bighorn                             | fisherj@uvic.ca                 | Canada   | 82                       | 3.91                 | Yes      | 100                 | Treatment | High             | Season     | 2020-06-01 | 2020-07-31 | 60              |
|                                     |                                 |          |                          |                      |          |                     | Control   | Low              | Season     | 2019-10-01 | 2019-11-30 | 60              |
| Brodie                              | jedediah.brodie@gmail.com       | Malaysia | 43                       | 0.98                 | No       | -                   | Treatment | High             | Year       | 2020-05-29 | 2020-08-13 | 76              |
|                                     |                                 |          |                          |                      |          |                     | Control   | Low              | Year       | 2019-05-29 | 2019-08-13 | 76              |



|                           |                                                                               |           |    |      |     |    |           |      |        |            |            |     |
|---------------------------|-------------------------------------------------------------------------------|-----------|----|------|-----|----|-----------|------|--------|------------|------------|-----|
| Cathedral                 | cole.burton@ubc.ca                                                            | Canada    | 39 | 1.55 | No  | -  | Treatment | High | Year   | 2020-07-05 | 2020-09-12 | 69  |
|                           |                                                                               |           |    |      |     |    | Control   | Low  | Year   | 2019-07-05 | 2019-09-12 | 69  |
| CJC                       | sturnina@gmail.com                                                            | CostaRica | 17 | 1.46 | No  | -  | Control   | High | Year   | 2019-03-13 | 2019-10-29 | 230 |
|                           |                                                                               |           |    |      |     |    | Treatment | Low  | Year   | 2020-03-13 | 2020-10-29 | 230 |
| CO_GrasslandOak_USAF<br>A | kelliekuhn@gmail.com                                                          | USA       | 46 | 0.36 | No  | -  | Control   | High | Year   | 2019-09-03 | 2019-11-08 | 66  |
|                           |                                                                               |           |    |      |     |    | Treatment | Low  | Year   | 2020-08-30 | 2020-10-22 | 53  |
| CT_Forest_Nye_Holman      | miranda.l.davis@uconn.edu                                                     | USA       | 29 | 0.26 | No  | -  | Control   | High | Year   | 2019-09-02 | 2019-10-18 | 46  |
|                           |                                                                               |           |    |      |     |    | Treatment | Low  | Year   | 2020-09-03 | 2020-10-17 | 44  |
| CT_Forest_Storrs          | erin.kuprewicz@uconn.edu                                                      | USA       | 20 | 0.09 | No  | -  | Treatment | Low  | Year   | 2020-09-02 | 2020-10-26 | 54  |
|                           |                                                                               |           |    |      |     |    | Control   | High | Year   | 2019-09-01 | 2019-10-12 | 41  |
| Danum_2020                | mattluskin@gmail.com; z.amir@uq.net.au                                        | Malaysia  | 32 | 0.43 | No  | -  | Control   | High | Season | 2020-01-07 | 2020-03-16 | 69  |
|                           |                                                                               |           |    |      |     |    | Treatment | Low  | Season | 2020-03-17 | 2020-05-26 | 70  |
| DE_Forest_Wilmington      | jacque.williamson@delaware.gov                                                | USA       | 28 | 2.68 | No  | -  | Treatment | High | Year   | 2020-08-21 | 2020-10-04 | 44  |
|                           |                                                                               |           |    |      |     |    | Control   | Low  | Year   | 2019-08-27 | 2019-10-15 | 49  |
| DKMP-PROTOKOL             | erturk@kastamonu.edu.tr                                                       | Turkey    | 53 | 1.61 | No  | -  | Treatment | High | Year   | 2020-05-30 | 2020-10-10 | 133 |
|                           |                                                                               |           |    |      |     |    | Control   | Low  | Year   | 2019-05-30 | 2019-10-10 | 133 |
| Edmonton                  | estclair@ualberta.ca;<br>catherine.shier@edmonton.ca;<br>cjsteven@ualberta.ca | Canada    | 35 | 2.35 | Yes | 39 | Treatment | High | Year   | 2020-04-17 | 2020-06-12 | 56  |
|                           |                                                                               |           |    |      |     |    | Control   | Low  | Year   | 2019-04-17 | 2019-06-12 | 56  |
| Foca                      | foca@ualberta.ca                                                              | Canada    | 65 | 1.9  | No  | -  | Treatment | Low  | Year   | 2020-05-01 | 2020-06-30 | 60  |
|                           |                                                                               |           |    |      |     |    | Control   | High | Year   | 2019-05-01 | 2019-06-30 | 60  |
| GE                        | cole.burton@ubc.ca                                                            | Canada    | 35 | 1.17 | No  | -  | Treatment | High | Year   | 2020-06-14 | 2020-07-31 | 47  |
|                           |                                                                               |           |    |      |     |    | Control   | Low  | Year   | 2019-06-14 | 2019-07-31 | 47  |

|                              |                                   |         |     |       |     |    |           |      |        |            |            |     |
|------------------------------|-----------------------------------|---------|-----|-------|-----|----|-----------|------|--------|------------|------------|-----|
| Hamaarag LT monitoring       | itai.mir@gmail.com                | Israel  | 83  | 0.03  | No  | -  | Control   | High | Season | 2020-09-18 | 2020-10-17 | 29  |
|                              |                                   |         |     |       |     |    | Treatment | Low  | Season | 2020-03-17 | 2020-05-04 | 48  |
| HI_Forest_O'ahu              | pricemel@hawaii.edu               | USA     | 18  | 0.18  | No  | -  | Treatment | High | Year   | 2020-09-17 | 2020-10-20 | 33  |
|                              |                                   |         |     |       |     |    | Control   | Low  | Year   | 2019-09-18 | 2019-11-01 | 44  |
| IA_Anthropogenic_Ames        | msrentz@iastate.edu               | USA     | 47  | 0.21  | No  | -  | Control   | High | Year   | 2019-09-05 | 2019-11-02 | 58  |
|                              |                                   |         |     |       |     |    | Treatment | Low  | Year   | 2020-08-29 | 2020-11-01 | 64  |
| IL_Forest_Urba               | maxallen@illinois.edu             | USA     | 26  | 0.23  | No  | -  | Control   | High | Year   | 2019-09-01 | 2019-09-30 | 29  |
|                              |                                   |         |     |       |     |    | Treatment | Low  | Year   | 2020-08-28 | 2020-09-30 | 33  |
| IN_Forest_Purdue_Lugar       | jmbrooke@purdue.edu               | USA     | 14  | 0.48  | No  | -  | Treatment | Low  | Year   | 2020-09-03 | 2020-10-22 | 49  |
|                              |                                   |         |     |       |     |    | Control   | High | Year   | 2019-09-08 | 2019-11-07 | 60  |
| IN_Forest_Purdue_PWA_Martell | jmbrooke@purdue.edu               | USA     | 17  | 0.51  | No  | -  | Control   | Low  | Year   | 2019-09-07 | 2019-10-29 | 52  |
|                              |                                   |         |     |       |     |    | Treatment | High | Year   | 2020-09-01 | 2020-10-15 | 44  |
| INBO_01                      | jim.casaer@inbo.be                | Belgium | 296 | 0.27  | No  | -  | Treatment | High | Year   | 2020-03-13 | 2020-07-30 | 139 |
|                              |                                   |         |     |       |     |    | Control   | Low  | Year   | 2019-03-13 | 2019-07-30 | 139 |
| ISPRA_CP                     | barbara.franzetti@isprambiente.it | Italy   | 78  | 0.83  | No  | -  | Control   | High | Year   | 2019-03-30 | 2019-04-26 | 27  |
|                              |                                   |         |     |       |     |    | Treatment | Low  | Year   | 2020-05-08 | 2020-06-12 | 35  |
| Kohl                         | michel.kohl@uga.edu               | USA     | 50  | 11.52 | Yes | 44 | Control   | Low  | Season | 2020-02-24 | 2020-03-18 | 23  |
|                              |                                   |         |     |       |     |    | Treatment | High | Season | 2020-04-02 | 2020-04-25 | 23  |
| Kootenays                    | emily.chow@gov.bc.ca              | Canada  | 80  | 7.81  | No  | -  | Treatment | High | Year   | 2020-03-15 | 2020-06-15 | 92  |
|                              |                                   |         |     |       |     |    | Control   | Low  | Year   | 2019-03-15 | 2019-06-15 | 92  |
| KS_Forest_Lawrence           | rhagen@ku.edu                     | USA     | 25  | 0.33  | No  | -  | Treatment | Low  | Year   | 2020-09-22 | 2020-11-22 | 61  |
|                              |                                   |         |     |       |     |    | Control   | High | Year   | 2019-09-16 | 2019-10-27 | 41  |

|                                        |                             |                |     |      |     |     |           |      |        |            |            |     |
|----------------------------------------|-----------------------------|----------------|-----|------|-----|-----|-----------|------|--------|------------|------------|-----|
| LA_Forest_Hammond                      | teague.omara@gmail.com      | USA            | 18  | 0.17 | No  | -   | Treatment | High | Year   | 2020-09-02 | 2020-10-21 | 49  |
|                                        |                             |                |     |      |     |     | Control   | Low  | Year   | 2019-09-11 | 2019-10-23 | 42  |
| LC01                                   | miroslav.kutal@hnutiduha.cz | Czech Republic | 85  | 4.3  | No  | -   | Treatment | High | Year   | 2020-03-16 | 2020-06-01 | 77  |
|                                        |                             |                |     |      |     |     | Control   | Low  | Year   | 2019-03-16 | 2019-06-01 | 77  |
| MA_Forest_Bridgewater_State_University | mfisherreid@bridgew.edu     | USA            | 16  | 0.21 | No  | -   | Treatment | High | Year   | 2020-08-30 | 2020-11-01 | 63  |
|                                        |                             |                |     |      |     |     | Control   | Low  | Year   | 2019-08-29 | 2019-11-06 | 69  |
| MalaMalaLondoloji                      | lucyksmyth@gmail.com        | South Africa   | 95  | 1.71 | No  | -   | Control   | High | Year   | 2018-08-01 | 2018-09-24 | 54  |
|                                        |                             |                |     |      |     |     | Treatment | Low  | Year   | 2020-06-09 | 2020-08-03 | 55  |
| MAMIRAU                                | daniibarcelos@gmail.com     | Brazil         | 26  | 1.95 | No  | -   | Control   | High | Year   | 2018-03-31 | 2018-05-31 | 61  |
|                                        |                             |                |     |      |     |     | Treatment | Low  | Year   | 2020-03-31 | 2020-05-31 | 61  |
| Maremma                                | francesco.ferretti@unisi.it | Italy          | 53  | 0.73 | No  | -   | Control   | High | Year   | 2019-04-01 | 2019-06-15 | 75  |
|                                        |                             |                |     |      |     |     | Treatment | Low  | Year   | 2020-04-01 | 2020-06-15 | 75  |
| MaxPlanck_01_Field                     | wikelski@ab.mpg.de          | Germany        | 79  | 2.2  | No  | -   | Control   | High | Year   | 2018-07-01 | 2020-03-21 | 629 |
|                                        |                             |                |     |      |     |     | Treatment | Low  | Year   | 2020-03-22 | 2020-10-01 | 193 |
| MaxPlanck_01_Forest                    | wikelski@ab.mpg.de          | Germany        | 54  | 0.75 | No  | -   | Control   | High | Year   | 2018-07-01 | 2020-03-21 | 629 |
|                                        |                             |                |     |      |     |     | Treatment | Low  | Year   | 2020-03-22 | 2020-10-01 | 193 |
| MaxPlanck_01_Yard                      | wikelski@ab.mpg.de          | Germany        | 103 | 4.85 | No  | -   | Treatment | High | Year   | 2020-03-22 | 2020-10-01 | 193 |
|                                        |                             |                |     |      |     |     | Control   | Low  | Year   | 2018-07-01 | 2020-03-21 | 629 |
| MELOCAM                                | pablo.ferreras@uclm.es      | Spain          | 43  | 0.36 | Yes | 100 | Treatment | Low  | Season | 2020-03-15 | 2020-06-21 | 98  |
|                                        |                             |                |     |      |     |     | Control   | High | Season | 2020-06-22 | 2020-08-31 | 70  |
| MI_Forest_Upper_Peninsula              | truhubba@nmu.edu            | USA            | 54  | 1.1  | No  | -   | Treatment | High | Year   | 2020-09-03 | 2020-11-08 | 66  |
|                                        |                             |                |     |      |     |     | Control   | Low  | Year   | 2019-08-29 | 2019-11-05 | 68  |

|                                         |                                  |        |     |      |    |   |           |      |        |            |            |    |
|-----------------------------------------|----------------------------------|--------|-----|------|----|---|-----------|------|--------|------------|------------|----|
| MK                                      | cole.burton@ubc.ca               | Canada | 21  | 1.05 | No | - | Treatment | High | Year   | 2020-07-11 | 2020-08-25 | 45 |
|                                         |                                  |        |     |      |    |   | Control   | Low  | Year   | 2019-07-11 | 2019-08-25 | 45 |
| MO_Anthropogenic_University_of_Missouri | r.revord@missouri.edu            | USA    | 29  | 0.35 | No | - | Control   | High | Year   | 2019-09-03 | 2019-10-24 | 51 |
|                                         |                                  |        |     |      |    |   | Treatment | Low  | Year   | 2020-08-13 | 2020-11-02 | 81 |
| MO_Forest_Bull_Shoals                   | spmaher@missouristate.edu        | USA    | 19  | 0.45 | No | - | Treatment | Low  | Year   | 2020-08-29 | 2020-10-31 | 63 |
|                                         |                                  |        |     |      |    |   | Control   | High | Year   | 2019-08-26 | 2019-11-02 | 68 |
| Moreira2020                             | moreira.dario@gmail.com          | Chile  | 6   | 1.88 | No | - | Control   | High | Season | 2020-10-16 | 2021-01-10 | 68 |
|                                         |                                  |        |     |      |    |   | Treatment | Low  | Season | 2021-01-11 | 2021-02-07 | 86 |
| MT_Grassland_SCBI                       | christopher3.hansen@umontana.edu | USA    | 101 | 0.63 | No | - | Treatment | High | Year   | 2020-08-19 | 2020-10-15 | 57 |
|                                         |                                  |        |     |      |    |   | Control   | Low  | Year   | 2019-08-31 | 2019-09-23 | 23 |
| MT_Roosevelt_Ranch                      | McSheaW@si.edu                   | USA    | 40  | 0.94 | No | - | Treatment | High | Year   | 2020-08-31 | 2020-11-01 | 62 |
|                                         |                                  |        |     |      |    |   | Control   | Low  | Year   | 2019-08-30 | 2019-11-07 | 69 |
| NC_Dare County                          | mvcove@ncsu.edu                  | USA    | 20  | 2.28 | No | - | Treatment | Low  | Year   | 2020-09-25 | 2020-10-23 | 28 |
|                                         |                                  |        |     |      |    |   | Control   | High | Year   | 2019-08-23 | 2019-11-05 | 74 |
| NC_Schenck                              | rwkays@ncsu.edu                  | USA    | 29  | 0.28 | No | - | Control   | High | Year   | 2019-09-09 | 2019-10-05 | 26 |
|                                         |                                  |        |     |      |    |   | Treatment | Low  | Year   | 2020-08-18 | 2020-09-30 | 43 |
| NCDA                                    | brett.furnas@wildlife.ca.gov     | USA    | 22  | 26.2 | No | - | Control   | High | Season | 2020-01-21 | 2020-03-20 | 59 |
|                                         |                                  |        |     |      |    |   | Treatment | Low  | Season | 2020-03-21 | 2020-05-21 | 61 |
| ND_Grassland_Oakville_Prairie           | susan.felege@und.edu             | USA    | 14  | 0.53 | No | - | Treatment | High | Year   | 2020-09-16 | 2020-11-04 | 49 |
|                                         |                                  |        |     |      |    |   | Control   | Low  | Year   | 2019-09-12 | 2019-10-18 | 36 |
| NJ_Forest_Rutgers                       | lathrop@crssa.rutgers.edu        | USA    | 13  | 0.22 | No | - | Treatment | High | Year   | 2020-08-31 | 2020-11-04 | 65 |
|                                         |                                  |        |     |      |    |   | Control   | Low  | Year   | 2019-09-01 | 2019-11-01 | 61 |

|                                          |                          |             |    |      |    |   |           |      |      |            |            |    |
|------------------------------------------|--------------------------|-------------|----|------|----|---|-----------|------|------|------------|------------|----|
| NPHV                                     | patrick.jansen@wur.nl    | Netherlands | 46 | 0.64 | No | - | Treatment | Same | Year | 2020-04-24 | 2020-05-15 | 21 |
|                                          |                          |             |    |      |    |   | Control   | Same | Year | 2019-04-24 | 2019-05-15 | 21 |
| NPTara_P1                                | dcirovic@bio.bg.ac.rs    | Serbia      | 16 | 1.49 | No | - | Control   | High | Year | 2019-03-01 | 2019-06-01 | 92 |
|                                          |                          |             |    |      |    |   | Treatment | Low  | Year | 2020-03-01 | 2020-06-01 | 92 |
| NY_Forest_Albany_Pine_Bush               | dbogan@siena.edu         | USA         | 29 | 0.23 | No | - | Treatment | High | Year | 2020-09-24 | 2020-11-20 | 57 |
|                                          |                          |             |    |      |    |   | Control   | Low  | Year | 2019-09-21 | 2019-10-24 | 33 |
| NY_Forest_Dyken_Pond                     | dbogan@siena.edu         | USA         | 28 | 0.21 | No | - | Treatment | High | Year | 2020-09-26 | 2020-10-29 | 33 |
|                                          |                          |             |    |      |    |   | Control   | Low  | Year | 2019-09-22 | 2019-10-25 | 33 |
| NY_Forest_Mianus_River_Gorge             | cmwnagy@gmail.com        | USA         | 40 | 0.36 | No | - | Treatment | High | Year | 2020-09-29 | 2020-11-10 | 42 |
|                                          |                          |             |    |      |    |   | Control   | Low  | Year | 2019-09-05 | 2019-11-08 | 64 |
| NY_Forest_Paul_Smiths_College            | ccincotta@paulsmiths.edu | USA         | 12 | 0.16 | No | - | Treatment | High | Year | 2020-09-14 | 2020-11-06 | 53 |
|                                          |                          |             |    |      |    |   | Control   | Low  | Year | 2019-09-05 | 2019-10-15 | 40 |
| NY_Forest_St_Lawrence_University         | barthelmess@stlawu.edu   | USA         | 26 | 2.5  | No | - | Treatment | High | Year | 2020-09-24 | 2020-11-09 | 46 |
|                                          |                          |             |    |      |    |   | Control   | Low  | Year | 2019-09-17 | 2019-11-17 | 61 |
| OFP                                      | ajmarsha@umich.edu       | Indonesia   | 50 | 0.55 | No | - | Treatment | High | Year | 2020-03-17 | 2020-04-28 | 42 |
|                                          |                          |             |    |      |    |   | Control   | Low  | Year | 2019-03-17 | 2019-04-28 | 42 |
| OH_Forest_Huston-Brumbaugh Nature Center | zornas@mountunion.edu    | USA         | 18 | 0.29 | No | - | Treatment | Low  | Year | 2020-08-24 | 2020-10-28 | 65 |
|                                          |                          |             |    |      |    |   | Control   | High | Year | 2019-08-30 | 2019-11-01 | 63 |
| OK_Grassland_Ardmore                     | slwebb@noble.org         | USA         | 24 | 1.1  | No | - | Treatment | Low  | Year | 2020-08-07 | 2020-10-12 | 66 |
|                                          |                          |             |    |      |    |   | Control   | High | Year | 2019-09-23 | 2019-10-10 | 17 |
| OK_Grassland_Burneyville                 | slwebb@noble.org         | USA         | 21 | 0.56 | No | - | Treatment | Low  | Year | 2020-09-21 | 2020-10-12 | 21 |
|                                          |                          |             |    |      |    |   | Control   | High | Year | 2019-09-23 | 2019-10-10 | 17 |

|                                        |                                         |         |     |       |     |     |           |      |        |            |            |     |
|----------------------------------------|-----------------------------------------|---------|-----|-------|-----|-----|-----------|------|--------|------------|------------|-----|
| OKO_LOG                                | julian.weber@oeko-log.com               | Germany | 7   | 24.81 | No  | -   | Treatment | High | Year   | 2020-03-01 | 2020-06-01 | 92  |
|                                        |                                         |         |     |       |     |     | Control   | Low  | Year   | 2019-03-01 | 2019-06-01 | 92  |
| OR_Forest_Oregon_State_University      | cara.appel@oregonstate.edu              | USA     | 27  | 0.48  | No  | -   | Treatment | Same | Year   | 2020-09-04 | 2020-10-24 | 50  |
|                                        |                                         |         |     |       |     |     | Control   | Same | Year   | 2019-09-06 | 2019-10-23 | 47  |
| PacificRimArray                        | yuri.zharikov@canada.ca                 | Canada  | 108 | 1.14  | No  | -   | Control   | High | Year   | 2019-03-01 | 2019-05-31 | 91  |
|                                        |                                         |         |     |       |     |     | Treatment | Low  | Year   | 2020-03-01 | 2020-05-31 | 91  |
| PCA_Chile                              | christian.osorio@carnivorosaustales.org | Chile   | 20  | 3.22  | Yes | 100 | Control   | High | Season | 2020-01-01 | 2020-02-28 | 58  |
|                                        |                                         |         |     |       |     |     | Treatment | Low  | Season | 2020-03-01 | 2020-04-30 | 60  |
| PNAB_CAM                               | francesco.rovero@unifi.it               | Italy   | 30  | 1.57  | No  | -   | Treatment | High | Year   | 2020-06-11 | 2020-07-15 | 34  |
|                                        |                                         |         |     |       |     |     | Control   | Low  | Year   | 2019-06-11 | 2019-07-15 | 34  |
| RI_Forest_University_of_Rhode_Island   | bgerber@uri.edu                         | USA     | 22  | 0.31  | No  | -   | Treatment | High | Year   | 2020-09-20 | 2020-11-28 | 69  |
|                                        |                                         |         |     |       |     |     | Control   | Low  | Year   | 2019-09-16 | 2019-11-08 | 53  |
| SantaCruz                              | maxallen@illinois.edu                   | USA     | 74  | 3.87  | No  | -   | Control   | Low  | Year   | 2017-03-19 | 2017-05-30 | 72  |
|                                        |                                         |         |     |       |     |     | Treatment | High | Year   | 2020-03-19 | 2020-05-30 | 72  |
| SC_Forest_Piedmont                     | djachow@clemsun.edu                     | USA     | 13  | 1.5   | No  | -   | Treatment | High | Year   | 2020-09-01 | 2020-10-31 | 60  |
|                                        |                                         |         |     |       |     |     | Control   | Low  | Year   | 2019-08-31 | 2019-11-09 | 70  |
| SD_Grassland_Custer_County             | jalston@uwyo.edu                        | USA     | 18  | 0.24  | No  | -   | Treatment | Low  | Year   | 2020-09-15 | 2020-11-12 | 58  |
|                                        |                                         |         |     |       |     |     | Control   | High | Year   | 2019-09-15 | 2019-11-07 | 53  |
| SD_Shelterbelt_and_Grassland_Brookings | robert.lonsinger@okstate.edu            | USA     | 19  | 1.28  | No  | -   | Treatment | High | Year   | 2020-09-03 | 2020-10-21 | 48  |
|                                        |                                         |         |     |       |     |     | Control   | Low  | Year   | 2019-09-10 | 2019-10-30 | 50  |
| SeatoSkyMamMon                         | kim.dawe@gmail.com                      | Canada  | 31  | 0.8   | No  | -   | Control   | High | Year   | 2019-06-01 | 2019-09-21 | 112 |
|                                        |                                         |         |     |       |     |     | Treatment | Low  | Year   | 2020-06-01 | 2020-09-21 | 112 |

|                                                         |                                                                        |              |     |      |     |     |           |      |        |            |            |    |
|---------------------------------------------------------|------------------------------------------------------------------------|--------------|-----|------|-----|-----|-----------|------|--------|------------|------------|----|
| Silva-Rodriguez2020                                     | eduardo.silva@uach.cl                                                  | Chile        | 8   | 0.9  | No  | -   | Control   | High | Season | 2020-09-22 | 2020-11-06 | 45 |
|                                                         |                                                                        |              |     |      |     |     | Treatment | Low  | Season | 2020-11-07 | 2020-12-22 | 45 |
| Slovenia                                                | miha.krofel@gmail.com                                                  | Slovenia     | 144 | 1.96 | No  | -   | Treatment | High | Season | 2020-03-15 | 2020-04-11 | 27 |
|                                                         |                                                                        |              |     |      |     |     | Control   | Low  | Season | 2020-01-01 | 2020-03-12 | 71 |
| SouthChilcotinMountains                                 | Robin.Naidoo@wwfus.org                                                 | Canada       | 61  | 2.19 | No  | -   | Treatment | High | Year   | 2020-07-01 | 2020-08-31 | 61 |
|                                                         |                                                                        |              |     |      |     |     | Control   | Low  | Year   | 2019-07-01 | 2019-08-31 | 61 |
| SUCP                                                    | katie.remine@zoo.org;<br>Robert.Long@Zoo.org;<br>jordanma@seattleu.edu | USA          | 22  | 3.54 | Yes | 100 | Control   | High | Season | 2020-07-04 | 2020-08-04 | 31 |
|                                                         |                                                                        |              |     |      |     |     | Treatment | Low  | Season | 2020-06-03 | 2020-07-03 | 30 |
| Tembe                                                   | lucyksmyth@gmail.com                                                   | South Africa | 32  | 0.07 | No  | -   | Control   | High | Year   | 2019-04-12 | 2019-05-14 | 32 |
|                                                         |                                                                        |              |     |      |     |     | Treatment | Low  | Year   | 2020-04-12 | 2020-05-14 | 32 |
| TN_Forest_Cheatham                                      | cb3552@msstate.edu                                                     | USA          | 25  | 0.48 | No  | -   | Treatment | High | Year   | 2020-10-06 | 2020-11-16 | 41 |
|                                                         |                                                                        |              |     |      |     |     | Control   | Low  | Year   | 2019-09-19 | 2019-11-04 | 46 |
| TN_Forest_Cumberland<br>Gap National Historical<br>Park | laroy.brandt@lmunet.edu                                                | USA          | 9   | 0.56 | No  | -   | Treatment | Low  | Year   | 2020-08-19 | 2020-11-03 | 76 |
|                                                         |                                                                        |              |     |      |     |     | Control   | High | Year   | 2019-09-06 | 2019-11-04 | 59 |
| TX_Forest_Pineywoods_<br>Angeli                         | christopher.schalk@usda.gov                                            | USA          | 29  | 0.24 | No  | -   | Treatment | High | Year   | 2020-10-02 | 2020-10-26 | 24 |
|                                                         |                                                                        |              |     |      |     |     | Control   | Low  | Year   | 2019-09-21 | 2019-10-11 | 20 |
| TX_Grassland_Abilene                                    | leet@acu.edu                                                           | USA          | 21  | 0.4  | No  | -   | Treatment | High | Year   | 2020-08-18 | 2020-10-24 | 67 |
|                                                         |                                                                        |              |     |      |     |     | Control   | Low  | Year   | 2019-09-01 | 2019-11-02 | 62 |
| TX_Grassland_Matador                                    | caroline.ellison@tpwd.texas.gov                                        | USA          | 20  | 1.68 | No  | -   | Treatment | High | Year   | 2020-08-31 | 2020-11-02 | 63 |
|                                                         |                                                                        |              |     |      |     |     | Control   | Low  | Year   | 2019-09-05 | 2019-11-05 | 61 |
| Umea                                                    | tim.hofmeester@slu.se                                                  | Sweden       | 12  | 8.43 | No  | -   | Treatment | High | Season | 2020-04-28 | 2020-06-13 | 46 |
|                                                         |                                                                        |              |     |      |     |     | Control   | Low  | Season | 2020-06-14 | 2020-07-30 | 46 |

|                                    |                            |                |     |       |    |   |           |      |        |            |            |    |
|------------------------------------|----------------------------|----------------|-----|-------|----|---|-----------|------|--------|------------|------------|----|
| UniBrno_01                         | r.pihal@seznam.cz          | Czech Republic | 28  | 0.34  | No | - | Treatment | High | Season | 2020-03-15 | 2020-04-07 | 23 |
|                                    |                            |                |     |       |    |   | Control   | Low  | Season | 2020-02-27 | 2020-03-14 | 16 |
| UniHasselt_01                      | jim.casaer@inbo.be         | Belgium        | 114 | 0.54  | No | - | Control   | High | Year   | 2019-04-01 | 2019-06-01 | 61 |
|                                    |                            |                |     |       |    |   | Treatment | Low  | Year   | 2020-04-01 | 2020-06-01 | 61 |
| UniZagreb_Agri_01                  | -                          | Croatia        | 35  | 2.05  | No | - | Treatment | Low  | Year   | 2020-03-15 | 2020-04-23 | 39 |
|                                    |                            |                |     |       |    |   | Control   | Low  | Year   | 2019-03-15 | 2019-04-23 | 39 |
| UT_Desert_Wasatch                  | austin.m.green@utah.edu    | USA            | 44  | 1.79  | No | - | Treatment | High | Year   | 2020-09-05 | 2020-11-05 | 61 |
|                                    |                            |                |     |       |    |   | Control   | Low  | Year   | 2019-09-01 | 2019-11-17 | 77 |
| VA_Forest_Richmond(rural)          | jsevin@richmond.edu        | USA            | 16  | 0.22  | No | - | Control   | High | Year   | 2019-09-04 | 2019-11-11 | 68 |
|                                    |                            |                |     |       |    |   | Treatment | Low  | Year   | 2020-09-07 | 2020-11-03 | 57 |
| VA_Forest_Richmond(suburban)       | jsevin@richmond.edu        | USA            | 12  | 0.33  | No | - | Treatment | Low  | Year   | 2020-09-13 | 2020-10-28 | 45 |
|                                    |                            |                |     |       |    |   | Control   | High | Year   | 2019-08-08 | 2019-11-06 | 90 |
| VA_Forest_SCBI_GEO                 | McSheaW@si.edu             | USA            | 61  | 0.13  | No | - | Control   | High | Year   | 2019-08-27 | 2019-10-09 | 43 |
|                                    |                            |                |     |       |    |   | Treatment | Low  | Year   | 2020-09-01 | 2020-10-30 | 59 |
| Vinci                              | claudie.miaud@cefe.cnrs.fr | France         | 64  | 16.57 | No | - | Treatment | High | Year   | 2020-03-01 | 2020-06-01 | 92 |
|                                    |                            |                |     |       |    |   | Control   | Low  | Year   | 2019-03-01 | 2019-06-01 | 92 |
| WA_Forest_Seattle_Urban_Carnivores | jordanma@seattleu.edu      | USA            | 19  | 3.03  | No | - | Treatment | High | Year   | 2020-08-24 | 2020-11-21 | 89 |
|                                    |                            |                |     |       |    |   | Control   | Low  | Year   | 2019-08-31 | 2019-11-08 | 69 |
| Waterton Corridor                  | kimberly.pearson@ca da.ca  | Canada         | 38  | 0.22  | No | - | Control   | High | Year   | 2019-03-15 | 2019-05-15 | 61 |
|                                    |                            |                |     |       |    |   | Treatment | Low  | Year   | 2020-03-15 | 2020-05-15 | 61 |
| WI_Forest_Whitewater               | romeroa@gmail.com          | USA            | 13  | 0.22  | No | - | Control   | High | Year   | 2019-09-07 | 2019-11-01 | 55 |
|                                    |                            |                |     |       |    |   | Treatment | Low  | Year   | 2020-09-01 | 2020-10-21 | 50 |



|                               |                                    |         |    |      |    |   |           |      |        |            |            |     |
|-------------------------------|------------------------------------|---------|----|------|----|---|-----------|------|--------|------------|------------|-----|
| WV_Forest_WVU_Research_Forest | christopher.rota@mail.wvu.edu      | USA     | 44 | 0.36 | No | - | Treatment | High | Year   | 2020-09-12 | 2020-11-06 | 55  |
|                               |                                    |         |    |      |    |   | Control   | Low  | Year   | 2019-09-24 | 2019-10-24 | 30  |
| WY_Grassland_Carbon_County    | jalston@uwyo.edu                   | USA     | 20 | 0.35 | No | - | Treatment | High | Year   | 2020-09-13 | 2020-11-07 | 55  |
|                               |                                    |         |    |      |    |   | Control   | Low  | Year   | 2019-09-07 | 2019-11-10 | 64  |
| YWW                           | dlaffert@nmu.edu; truhubba@nmu.edu | USA     | 30 | 1.17 | No | - | Treatment | High | Season | 2020-04-17 | 2020-08-01 | 106 |
|                               |                                    |         |    |      |    |   | Control   | Low  | Season | 2020-01-01 | 2020-04-11 | 101 |
| LifeLynxCro_01                | magda.sindicic@vef.unizg.hr        | Croatia | 49 | 5.44 | No | - | Treatment | High | Year   | 2020-03-15 | 2020-05-15 | 61  |
|                               |                                    |         |    |      |    |   | Control   | Low  | Year   | 2019-03-15 | 2019-05-15 | 61  |

## Full Acknowledgements

We thank Mason Fidino, Mahdiah Tourani, and an anonymous referee for constructive feedback on earlier versions of the manuscript.

This paper was written and prepared in part by U.S. Government employees on official time, and therefore it is in the public domain and not subject to copyright.

This research was supported in part by the USDA Forest Service.

The findings and conclusions in this publication are those of the authors and should not be construed to represent an official USDA, Forest Service, or U.S. Government determination or policy.

*Individual projects that contributed to this study received funding from the following:*

British Columbia Ministry of Environment and Climate Change Strategy, BC Parks

Clark Stevens Endowed Professorship

James Lea Foundation

Wilburforce Foundation

Charlotte Martin Foundation

Pemberton Wildlife Association

National Science Centre, Poland (grant number 2017/25/B/NZ8/02466)

Fundación Naturaleza El Salvador

USFWS Federal Aid in Wildlife Restoration Grant to Wisconsin Dept. of Natural Resources

Idea Wild

Rufford Small Grants

Sea Turtle Conservancy

Upper Delta Region Biodiversity Scholarship, National Science Foundation (Award # 1564954)

Watershed Studies Institute, Murray State University

Lincoln Memorial University

Cumberland Mountain Research Center

FCT/MCTES to CESAM (UIDP/50017/2020+UIDB/50017/2020+ LA/P/0094/2020)

This work makes use of data and/or infrastructure provided by the Research Institute for Nature and Forests (INBO) and funded by Research Foundation - Flanders (FWO) as part of the Belgian contribution to LifeWatch

Fish and Wildlife Compensation Program

Pittman-Robertson Wildlife Restoration Act

Public Service of Wallonia

Regional Government of Castilla-La Mancha and the European Regional Development Fund (ERDF) (Project SBPLY/17/180501/000184)

National Science Centre, Poland (grant number 2017/25/B/NZ8/02466)

University of North Dakota Biology Department

General Directorate of Nature Conservation and National Parks

Maremma Regional Park Agency

German Society for Mammalian Biology - DGS Project Funding 2018

Forest Resource Improvement Association of Alberta

InnoTech Alberta

Alberta Environment and Parks  
Yellowstone to Yukon Initiative  
Canadian Mountain Network  
Mitacs Canada  
LIFE Lynx LIFE16 NAT/SI/000634  
Alberta Conservation Association  
Northern Alberta Chapter of Safari Club International  
Alberta Fish and Game Association  
Beaver Hills Initiative  
Friends of Elk Island Society  
Segretariato Generale per la Presidenza della Repubblica  
Servizio Tenuta presidenziale di Castelporziano  
Parks Victoria  
Global Change and Sustainability Center - University of Utah  
University of Kansas Environmental Studies Program  
Boone and Crockett Club  
University of Montana Boone and Crockett Wildlife Conservation Program  
National Science Foundation (NSF) LTREB awards #2038704 and 1556248 to M.H.  
Parks Canada  
Urban Futures platform - Swedish University of Agricultural Sciences  
South Carolina Department of Natural Resources  
Conselho de Aperfeiçoamento de Pessoal de Nível Superior (CAPES, proc. BEX 1 298/2015-01)  
German Federal Ministry of Education and Research (BMBF) Collaborative Knowledge  
Transfer Project 'WTImpact' (funding number 01IO1725)  
Slovenian Research and Innovation Agency (ARRS, grants no. N1-0163 and J1-50013)  
EuroNatur Foundation, European Union's Interreg Danube Transnational Programme  
(SaveGREEN DTP3-314-2.3)  
New Jersey Agricultural Experiment Station  
USDA Forest Service, Pacific Northwest Research Station  
South Dakota Agricultural Experiment Station  
Woodland Park Zoo  
Seattle University  
The Royal Commission for AIUla  
South African National Biodiversity Institute  
Singita  
University of California, Davis  
University of Michigan  
Victoria University of Wellington  
Chinese Academy of Sciences  
Xishuang- banna Tropical Botanical Garden  
Hellman Foundation  
Leakey Foundation  
Orangutan Conservancy  
Fulbright Foundation  
Mohamed bin Zayed Species Conservation Fund  
AZA Ape TAG Initiative.

Vinci Autoroute, contract VINCI-CNRS  
Grant ANID PIA/BASAL FB210006  
Tyax Adventures  
Servizio Faunistico, Provincia Autonoma di Trento  
Ministero per la Transizione Ecologica, Provincia Autonoma di Trento  
Specific University Research Fund MENDELU (IGA-LDF22TP2-107)  
Fundación Naturaleza El Salvador  
Conselho Nacional de Desenvolvimento Científico e Tecnológico (CNPq)  
Carnivora Dinarica Interreg project  
McIntire-Stennis WVA00818  
McDowell Sonoran Conservancy  
The Gordon and Betty Moore Foundation (GBMF9881 to C.R.) and the National Geographic Society (NGS-82515R-20 to C.R.) to the COVID-19 Bio-Logging Initiative  
Segre Foundation  
Sigrid Rausing Trust  
H. Batubay Özkan  
Barbara Watkins  
John and Adrienne Mars  
City of Edmonton  
University of Alberta (Faculty of Science Research Fellowship and Teaching Assistantship)  
Natural Sciences and Engineering Research Council of Canada (NSERC; Discovery Grant; RGPIN-2017-05915)  
NSERC Canada Graduate Scholarships – Master’s (CGS-M)  
Walter H. Johns Graduate Fellowship Program  
Alberta Graduate Excellence Scholarship (Indigenous) Program  
Rupertsland Institute  
Sustainability Scholar Program (the City of Edmonton and the University of Alberta)  
ANID Fondecyt 11171006 and 1221528  
Institute of Ecology and Biodiversity-Chile (Grant ANID/BASAL FB210006)  
iCWild  
National Research Foundation of South Africa  
General Directorate of Nature Conservation and National Parks  
European Food and Safety Authority  
Noble Research Institute, LLC  
Deutsche Forschungsgemeinschaft (DFG, German Research Foundation) under Germany's ExcellenceStrategy – EXC 2117 – 422037984  
Technology Agency of the Czech Republic and the Ministry of the Environment within the "Prostředí pro život" Programme, No. SS05010008

*Individual projects that contributed to this study received assistance from the following:*

Wildlife Coexistence Lab, Faculty of Forestry, University of British Columbia  
BC Parks  
ACTo-SINAC  
Murray State University Wildlife and Fisheries Society student members  
Snapshot USA assistants

Lincoln Memorial students  
M. Rossa, P. Linck and D. Hipólito  
R. Bagchi of the University of Connecticut for help in data collection and design  
Guillaume Morrel  
University of North Dakota's (UND) Field Stations, Wildlife Society, and Wildlife Techniques Course  
Levin Brandt  
Wardens of Maremma Regional Park  
R. Oliveira  
University of Siena students  
Wasatch Wildlife Watch community science team  
Sageland Collaborative  
Utah's Hogle Zoo  
Salt Lake City's Trails and Natural Lands Division  
University of Kansas Field Station  
Harrison Stoudt  
Elizabeth Saldo, Mike Muthersbaugh  
Woodland Park Zoo community science volunteers and Seattle University students.  
Georgia Department of Natural Resources - Urban Wildlife Program  
Moritz Wenzler-Meya, Team 'Wildtierforscher' and Berlin Citizens  
M. Bojda., M. Váňa, J. Labuda, B. Černá, K. Fridrochová, L. Hrdý, J. Koranda and volunteers of "Wolf Patrols"  
Marlin M. Dart  
WildlifeACT ran the survey on Tembe Elephant Park, which was done with permission and support from Ezemvelo KwaZulu-Natal Wildlife. We would like to thank Sabi Sand Wildtuin and Mala Mala for allowing surveys of their reserves  
Parks Canada staff, including Sarah Tyne, Daniel Grinnell, Michael Boudreau  
Jon Stuart-Smith  
Communities from the Amanã Reserve  
McDowell Sonoran Conservancy stewards  
KuzeyDoğa Derneği  
Snapshot Wisconsin volunteers including Zooniverse photo classifiers  
János Gombkötő  
Mike D. Proctor and Derick Warren  
oeko-log  
Caylen Wolfer  
Brandywine Zoo  
Meet Your Wild Neighbours participants  
Swedish University of Agricultural Sciences students  
The Steering Committee of the COVID-19 Bio-Logging Initiative  
Urban Wildlife Information Network (UWIN)  
WildEdmonton volunteers and University of Alberta students  
Disney Conservation Fund  
Marine Ventures Foundation  
Landsberg Foundation  
Marin Fish and Wildlife

Fresno Chaffee Zoo  
Conservation Society of California  
Thornton S. Glide, Jr. and Katrina D. Glide Foundation  
Olivia and Isabel Lepczyk  
Ligue de Protection des Oiseaux France
